# Supplementary material
Source: PubMed Central journal article supplement (PMC3161415)

# Enantioselective Nitroaldol Reaction of $\alpha$ -Ketoesters Catalyzed by Cinchona Alkaloids

Hongming Li, Baomin Wang and Li Deng\*

*Department of Chemistry*

*Brandeis University*

*Waltham, Massachusetts 02454-9110*

\*To whom correspondence should be addressed

## Supporting Information

**General Information.**  $^1\text{H}$  and  $^{13}\text{C}$  NMR spectra were recorded on a Varian instrument (400 MHz and 100 MHz, respectively) and internally referenced to tetramethylsilane signal or residual protio solvent signals. Data for  $^1\text{H}$  NMR are recorded as follows: chemical shift ( $\delta$ , ppm), multiplicity (s, singlet; d, doublet; t, triplet; q, quartet; m, multiplet), integration, coupling constant (Hz). Data for  $^{13}\text{C}$  NMR are reported in terms of chemical shift ( $\delta$ , ppm). Infrared spectra were recorded on a Perkin Elmer FT-IR Spectrometer and are reported in frequency of absorption. Low resolution mass spectra for all the new compounds were performed by 70SE CI+, and were recorded and exact mass spectra on a 70-VSE-B high resolution mass spectrometer. Specific rotations were measured on a Jasco Digital Polarimeter.

High performance liquid chromatography (HPLC) analysis was performed on a Hewlett-Packard 1100 Series instrument equipped with a quaternary pump, using a Daicel Chiralcel OJ, OD Column (250 x 4.6 mm) or Chiralpak AD, AS Column (250 x 4.6 mm). UV absorption was monitored at 220 nm or at 280 nm.

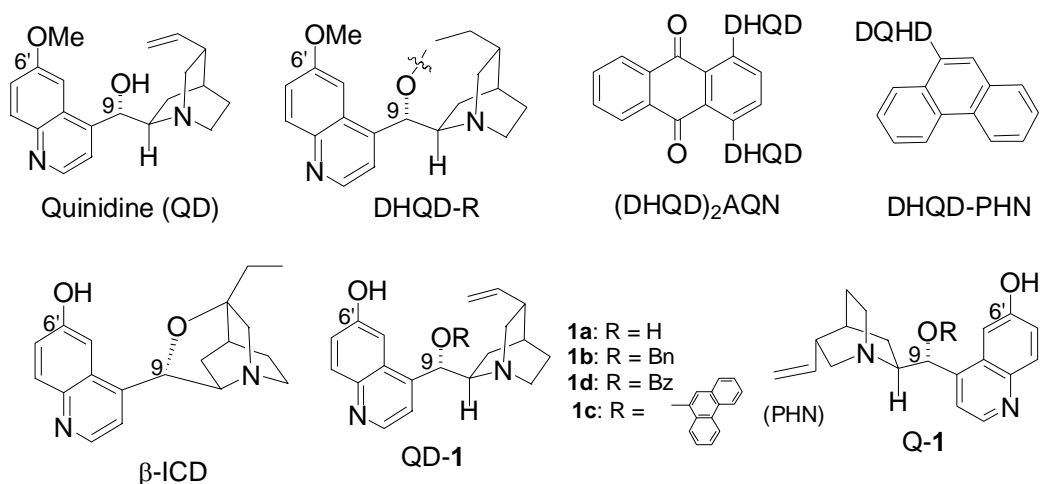

**Figure 1. The Structure of Cinchona Alkaloids**

**Materials:** (For structure of  $\alpha$ -ketoesters **2**, see Table1, for structure of cinchona alkaloid catalysts, see Figure 1)  $\alpha$ -ketoesters **2a**, **2b** were prepared according to literature procedures.<sup>1</sup> Other  $\alpha$ -ketoesters **2** were commercially available and purified by flash chromatography (silica gel 60, 0.040-0.063 mm, purchased from EM SCIENCE Inc.) before they were used for the nitroaldol reaction. Catalysts QD, DHQD-PHN, (DHQD)<sub>2</sub>AQN were purchased from Aldrich company and used without any further purification. C6'-OH catalysts Q-1**a-c** and QD-1**a-c** were prepared following procedures reported from these laboratories,<sup>2</sup> and β-ICD was prepared according to literature procedures.<sup>3</sup> Petroleum ether (36-60 °C) for chromatography was purchased from Fisher Company.

### Preparation of catalyst Q-1d:

#### 6'-OTIPS Quinine derivative Q-2:

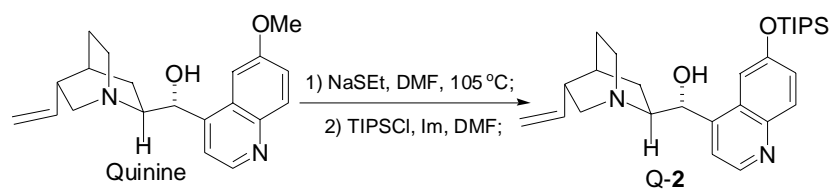

A suspension of quinine (3.6 g, 11.46 mmol), NaSEt (90% purity, 5g, 5eq.) in anhydrous DMF (60 mL) was heated at 105 °C (oil bath temperature) under N<sub>2</sub> for 16 hours. The mixture was cooled to room temperature then pored into sat. NH<sub>4</sub>Cl aq. (100 mL) and pH of the aqueous phase was around 7. The mixture was extracted with ethyl acetate (2 x 200 mL). The combined organic phase was washed with aqueous HCl (2N, 4 x 25 mL) and the combined aqueous phase was treated with ammonium hydroxide (20 mL) and the pH of the aqueous phase is 10-11. The mixture was exacted with ethyl acetate (2 x 250 mL), and the combined organic phase was washed with brine, dried over anhydrous Na<sub>2</sub>SO<sub>4</sub>. The solvent was removed in vacuo and the residue was dissolved in anhydrous DMF (50 mL). At room temperature, TIPSCl (4.6 mL, 2 eq.) was added to the solution, followed by addition of imidazole (1.5 g, 2 eq.). The resulting solution was stirred at room temperature for 4h, when TLC analysis indicated that the starting material was completely consumed. The reaction mixture was diluted with ethyl acetate (400 mL) and washed with sat. NaHCO<sub>3</sub> aq. (2 x 50 mL), brine and dried over anhydrous Na<sub>2</sub>SO<sub>4</sub>. The solvent was removed in vacuo and the crude product was purified by flash chromatography (ethyl acetate to ethyl acetate/MeOH/NH<sub>4</sub>OH = 20/2/0.5) to give Q-2 (4.7g, 90% yield over 2 steps).  $[\alpha]_D^{25} = -77.2$  (c 0.43, CHCl<sub>3</sub>); <sup>1</sup>H NMR (400 MHz, CDCl<sub>3</sub>) δ 8.71 (d, *J* = 4.0 Hz, 1H), 7.99 (d, *J* = 6.8 Hz, 1H), 7.46 (d, *J* = 2.0 Hz, 1H), 7.46 (s, 1H), 7.33 (dd, *J* = 2.4 Hz, 9.2 Hz, 1H), 5.81-5.72 (m, 1H), 5.43 (d, *J* = 4.8 Hz, 1H), 4.99-4.91 (m, 2H), 3.36-3.32 (m, 1H), 3.22-3.27 (m, 1H), 3.07 (dd, *J* = 10.0 Hz, 1H), 2.68-2.63 (m, 2H), 2.25 (br, 1H), 1.81-1.80 (m, 1H), 1.70-1.64 (m, 4H), 1.48 (br, 1H), 1.37-1.26 (m, 3H), 1.13 (d, *J* = 7.6 Hz, 18H); <sup>13</sup>C NMR (100 MHz, DMSO-d<sub>6</sub>) δ 154.2, 147.65, 147.59, 144.1, 141.9, 131.4, 126.7, 124.9, 118.6, 114.2, 109.9, 72.6, 59.9, 57.0, 43.1, 40.0, 27.8, 27.7, 22.4, 17.9, 12.7; IR (CHCl<sub>3</sub>) ν 3400-2400(br), 2943, 2866, 1616, 1506, 1457, 1258; HRMS (CI) m/z calcd. for (C<sub>28</sub>H<sub>42</sub>N<sub>2</sub>O<sub>2</sub>Si + H<sup>+</sup>): 467.3094, found: 467.3106.

*Catalyst Q-1d:*

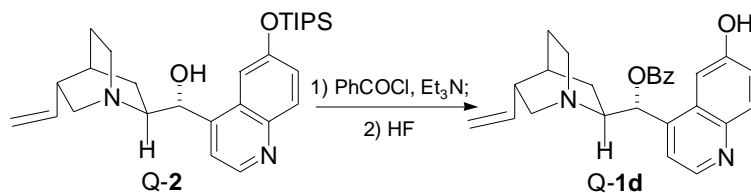

At room temperature to a solution of Q-2 (3.3 g, 7 mmol) in anhydrous  $\text{CH}_2\text{Cl}_2$  (40 mL) was added  $\text{PhCOCl}$  (0.91 mL, 1.1 eq.) and  $\text{Et}_3\text{N}$  (1.97 mL, 2 eq.). The resulting mixture was stirred at room temperature for 3 hours and TLC analysis indicated that the starting material was completely consumed. The reaction mixture was diluted with  $\text{CH}_2\text{Cl}_2$  (250 mL) and washed with sat.  $\text{NaHCO}_3$ , brine and dried over anhydrous  $\text{Na}_2\text{SO}_4$ . The solvent was removed in vacuo and the residue was dissolved in  $\text{CH}_3\text{CN}$  (50 mL). To the resulting solution, HF (48 % aqueous solution, 2.5 mL) was added dropwise through syringe. After 15 minutes, TLC analysis showed that the starting material was completely consumed and the reaction mixture was diluted with ethyl acetate (400 mL), washed with sat.  $\text{NaHCO}_3$  aq. (2 x 50 mL) and brine and dried over anhydrous  $\text{Na}_2\text{SO}_4$ . The solvent was removed in vacuo and the residue was purified by flash chromatography. (ethyl acetate/MeOH = 20/1) to give Q-1d as a white powder (2.7 g, 73% yield over 2 steps). m.p: 204-207 °C;  $[\alpha]_D^{25} = +89.3$  (c 0.45,  $\text{CHCl}_3$ );  $^1\text{H}$  NMR (400 MHz,  $\text{DMSO}-d_6$ )  $\delta$  10.16 (br, 1H), 8.62 (d,  $J = 4.4$  Hz, 1H), 8.07 (d,  $J = 8.0$  Hz, 2H), 7.90 (d,  $J = 8.4$  Hz, 1H), 7.70 (t,  $J = 7.2$  Hz, 1H), 7.59-7.51 (m, 4H), 7.32 (d,  $J = 9.2$  Hz, 1H), 6.44 (d,  $J = 7.6$  Hz, 1H), 5.99-5.91 (m, 1H), 5.03 (d,  $J = 18.4$  Hz, 1H), 4.98 (d,  $J = 11.6$  Hz, 1H), 3.50-3.48 (m, 1H), 3.09 (br, 1H), 2.92-2.86 (m, 1H), 2.54-2.43 (m, 2H), 2.24 (br, 1H), 1.96-1.93 (m, 1H), 1.79 (br, 1H), 1.72-1.68 (m, 1H), 1.59-1.49 (m, 2H);  $^{13}\text{C}$  NMR (100 MHz,  $\text{DMSO}-d_6$ )  $\delta$  165.7, 156.4, 147.3, 144.0, 143.9, 142.9, 134.4, 132.0, 130.0, 129.9, 129.6, 127.6, 122.3, 119.6, 115.1, 105.2, 79.8, 75.3, 59.9, 56.6, 42.4, 27.9, 27.8, 25.3; IR ( $\text{CHCl}_3$ )  $\nu$  3500-2300 (br), 2943, 1717, 1540, 1558, 1507, 1268; HRMS (CI) m/z calcd for ( $\text{C}_{26}\text{H}_{26}\text{N}_2\text{O}_3 + \text{H}^+$ ): 415.2022, found:415.2027.

## Preparation of catalyst QD-1d

6'-OTIPS quinidine derivative QD-2:

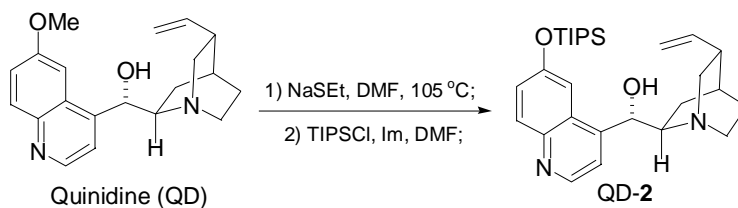

Following same procedure as described for preparation of Q-2, QD-2 was obtained in 75% yield from quinidine (QD).  $[\alpha]_{\text{D}}^{25} = +137.8$  (c 1.0,  $\text{CHCl}_3$ );  $^1\text{H NMR}$  (400 MHz,  $\text{CDCl}_3$ )  $\delta$  8.71 (d,  $J = 5.2$  Hz, 1H), 7.87 (d,  $J = 9.2$  Hz, 1H), 7.65 (d,  $J = 4.4$  Hz, 1H), 7.37 (d,  $J = 2.8$  Hz, 1H), 7.20 (dd,  $J = 2.4$  Hz, 9.2 Hz, 1H), 6.50 (br, 1H), 6.02-5.93 (m, 1H), 5.22 (d, 3.6 Hz, 1H), 5.19 (d,  $J = 10.4$  Hz, 1H), 4.25 (br, 1H), 3.37-3.31 (m, 3H), 3.14-3.08 (m, 1H), 2.54-2.51 (m, 1H), 2.32 (t,  $J = 12.0$  Hz, 1H), 1.93-1.86 (m, 2H), 1.68-1.63 (m, 1H), 1.36 (hept.  $J = 7.2$  Hz, 3H), 1.13 (d,  $J = 7.2$  Hz, 9H), 1.11 (d,  $J = 7.2$  Hz, 9H);  $^{13}\text{C NMR}$  (100 MHz,  $\text{DMSO-d}_6$ )  $\delta$  154.4, 147.8, 144.1, 143.7, 136.6, 131.3, 125.6, 124.7, 119.0, 117.3, 110.0, 67.3, 60.2, 49.2, 48.7, 37.6, 27.7, 23.6, 18.5, 18.05, 18.01, 12.8; IR ( $\text{CHCl}_3$ )  $\nu$  3217 (br), 2943, 2867, 1617, 1589, 1504, 1456, 1259; HRMS (CI)  $m/z$  calcd. for  $(\text{C}_{28}\text{H}_{42}\text{N}_2\text{O}_2\text{Si} + \text{H}^+)$ : 467.3094, found: 467.3103.

**Catalyst QD-1d :**

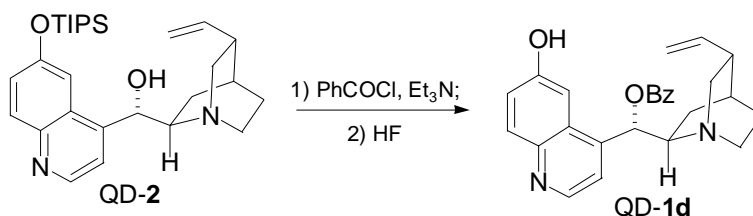

Following the same procedure described above for the preparation of Q-1d, QD-1d was prepared in 87% yield from QD-2. m.p.: 235-237  $^\circ\text{C}$ ;  $[\alpha]_{\text{D}}^{25} = -10$  (c 0.31,  $\text{CHCl}_3$ );  $^1\text{H NMR}$  (400 MHz,  $\text{CDCl}_3$ )  $\delta$  9.61 (br, 1H), 8.65 (d,  $J = 4.4$  Hz, 1H), 8.04 (d,  $J = 7.6$  Hz, 2H), 7.92 (d,  $J = 9.6$  Hz, 1H), 7.69 (s, 1H), 7.54 (t,  $J = 6.8$  Hz, 1H), 7.42-7.40 (m, 3H), 7.20 (d,  $J = 9.2$  Hz, 1H), 6.75 (d,  $J = 5.6$  Hz, 1H), 6.02-5.93 (m, 1H), 5.08 (d,  $J = 6.4$  Hz,

1H), 5.05 (d,  $J = 17.2$  Hz, 1H), 3.39 (dd,  $J = 8.4$  Hz, 6.4 Hz, 1H), 3.10-3.05 (m, 1H), 3.01-2.95 (m, 1H), 2.84-2.79 (m, 1H), 2.73-2.65 (m, 1), 2.27 (dd,  $J = 7.6$  Hz, 8.0 Hz, 1H), 2.01 (t,  $J = 9.6$  Hz, 1H), 1.83 (s, 1H), 1.50-1.48 (m, 3H);  $^{13}\text{C}$  NMR (100 MHz,  $\text{CDCl}_3$ )  $\delta$  165.2, 156.4, 146.1, 143.6, 143.4, 139.8, 133.3, 131.0, 129.7, 129.6, 128.5, 127.3, 122.8, 118.6, 115.1, 105.8, 74.3, 58.8, 49.6, 49.1, 39.2, 27.5, 26.0, 23.0; IR ( $\text{CHCl}_3$ )  $\nu$  2500-3500 (br), 3071, 2940, 1723, 1618, 1469, 1452, 1269, 1107; HRMS (ESI)  $m/z$  calcd for ( $\text{C}_{26}\text{H}_{26}\text{N}_2\text{O}_3 + \text{H}^+$ ): 415.2022, found: 415.2026.

**General procedure for enantioselective addition of nitromethane to  $\alpha$ -ketoesters **2** catalyzed by QD-1d and Q-1d:**

**Table 2** Enantioselective Nitroaldol Addition of Nitromethane to  $\alpha$ -Ketoester **2** Catalyzed by QD-1d and Q-1d (in brackets). <sup>a</sup>

**2** (0.5 mmol)  **3**

| Entry | R                       | Time / h | yield / % <sup>b</sup> | ee / % <sup>c</sup>  |
|-------|-------------------------|----------|------------------------|----------------------|
| 1     | <b>2a</b>               | 14 (15)  | 92 (92)                | 96 (97)              |
| 2     | <b>2b</b>               | 24 (24)  | 98 (99)                | 94 (95)              |
| 3     | <b>2c</b> Ph-           | 35 (46)  | 96 (96)                | 95 <sup>d</sup> (93) |
| 4     | <b>2d</b> 4-MeO-Ph-     | 96 (96)  | 86 (84)                | 94 (97)              |
| 5     | <b>2e</b> 4-MeS-Ph-     | 72 (72)  | 86 (86)                | 96 (96)              |
| 6     | <b>2f</b> 4-Cl-Ph-      | 12 (12)  | 98 (96)                | 97 <sup>d</sup> (96) |
| 7     | <b>2g</b> 4-CN-Ph-      | 9 (11)   | 96 (98)                | 94 (97)              |
| 8     | <b>2h</b> 3-Cl-Ph-      | 11 (11)  | 91 (96)                | 95 (95)              |
| 9     | <b>2i</b> 2-Naphthyl-   | 60 (60)  | 96 (97)                | 94 (94)              |
| 10    | <b>2j</b> Me-           | 12 (12)  | 89 (90)                | 95 (95)              |
| 11    | <b>2k</b> <i>n</i> -Pr- | 17 (15)  | 90 (90)                | 93 (93)              |
| 12    | <b>2l</b>               | 14 (11)  | 88 (89)                | 95 (94)              |
| 13    | <b>2m</b>               | 15 (11)  | 87 (86)                | 94 (93)              |

<sup>a</sup> Unless noted, reactions were run with 0.5 mmol of **2**, 5 mmol CH<sub>3</sub>NO<sub>2</sub> in 0.5 mL CH<sub>2</sub>Cl<sub>2</sub> with 5 mol% QD-1d, the results in parentheses were obtained with Q-1d to give opposite enantiomer, see Supporting Information for details. <sup>b</sup> Isolated yield. <sup>c</sup> Determined by HPLC analysis. <sup>d</sup> The absolute configuration is determined to be S, see Supporting Information for details.

At -20 °C, to a solution of  $\alpha$ -ketoester **2** (0.5 mmol), nitromethane (5 mmol) in CH<sub>2</sub>Cl<sub>2</sub> (0.5 mL) was added catalyst QD-1d or Q-1d (5 mol%). The resulting mixture was kept

at the indicated temperature until **2** is completely consumed. The reaction mixture was directly subjected to silica gel flash chromatography using the eluent specified below to afford the desired product in the yields and enantiomeric excess summarized above. The catalyst is recovered in greater than 95% yield by washing the silica gel column with MeOH. The recovered catalyst was identical to that before the reaction by NMR analysis and can be reused without further treatment.

### Data for nitroaldol products **3**:

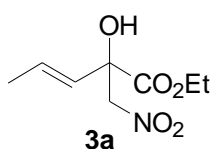

#### **(+)-2-Hydroxy-2-nitromethyl-pent-3-enoic acid ethyl ester (3a)**

This product was obtained as a colorless oil in 92% yield after flash chromatography (elution gradient: ethyl acetate/hexane = 1/15) and 96% ee as determined by HPLC analysis [Daicel chiralpak AD, hexanes:IPA, 90:10, 0.8 ml/min,  $\lambda$  215 nm,  $t$  (major) = 10.03 min,  $t$  (minor) = 10.91 min] from a reaction catalyzed by QD-**1d** (5 mol%) at -20 °C for 14 hours.  $[\alpha]_D^{25} = +56.0$  (c 0.93, CHCl<sub>3</sub>); <sup>1</sup>H NMR (400 MHz, CDCl<sub>3</sub>)  $\delta$  6.13 (dq,  $J = 15.2$  Hz, 6.8 Hz, 1H), 5.45 (dq,  $J = 15.2$  Hz, 1.6 Hz, 1H), 4.86 (d,  $J = 14.0$  Hz, 1H), 4.48 (d,  $J = 14.0$  Hz, 1H), 4.42-4.28 (m, 2H), 3.77 (s, 1H), 1.75 (dd,  $J = 1.2$  Hz, 14.0 Hz, 3H), 1.34 (t,  $J = 6.8$  Hz, 3H); <sup>13</sup>C NMR (100 MHz, CDCl<sub>3</sub>)  $\delta$  171.8, 130.6, 125.7, 79.9, 75.0, 63.2, 17.6, 13.9; these data is in agreement with those reported in literature.<sup>4</sup>

**(-)-2-Hydroxy-2-nitromethyl-pent-3-enoic acid ethyl ester (3a)** This product was obtained as a colorless oil in 92% yield and 97% ee from a reaction catalyzed by Q-**1d** (5.0 mol %) at -20 °C for 15 hours.

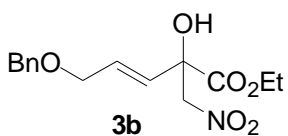

#### **(+)-5-Benzyloxy-2-hydroxy-2-nitromethyl-pent-3-enoic acid ethyl ester (3b)**

This product was obtained as a colorless oil in 98 % yield after flash chromatography (elution gradient: diethyl ether) and 94 % ee as determined by HPLC analysis [Daicel chiralpak AD, hexanes:IPA, 90:10, 0.8 ml/min,  $\lambda$  215 nm,  $t$  (major) = 17.65 min,  $t$  (minor) = 19.99 min] from a



reaction catalyzed by QD-1d (5 mol%) at -20 °C for 24 hours.  $[\alpha]_D^{25} = +29.8$  (c 1.22, CHCl<sub>3</sub>); <sup>1</sup>H NMR (400 MHz, CDCl<sub>3</sub>) δ 7.36-7.32 (m, 5H), 6.25 (dt, *J* = 15.2 Hz, 4.8 Hz, 1H), 5.76 (dt, *J* = 15.2 Hz, 1.6 Hz, 1H), 4.88 (dd, *J* = 14.0 Hz, 1.2 Hz, 1H), 4.53 (s, 2H), 4.48 (d, *J* = 13.2 Hz, 1H), 4.41-4.29 (m, 2H), 4.08-4.06 (m, 2H), 3.84 (s, 1H), 1.34 (t, *J* = 7.2 Hz, 3H); <sup>13</sup>C NMR (100 MHz, CDCl<sub>3</sub>) δ 171.4, 137.7, 131.5, 128.3, 127.7, 127.6, 125.8, 79.7, 75.1, 72.6, 68.9, 63.3, 13.9; IR (CHCl<sub>3</sub>) ν 3489 (br), 3031, 2983, 2859, 1742, 1560, 1453, 1378, 1220; HRMS (ESI) *m/z* calcd for (C<sub>15</sub>H<sub>19</sub>NO<sub>6</sub> + Na<sup>+</sup>): 332.1110, found: 332.1102.

**(-)-5-Benzyloxy-2-hydroxy-2-nitromethyl-pent-3-enoic acid ethyl ester (3b)** This product was obtained as a colorless oil in 99% yield and 95% ee from a reaction catalyzed by Q-1d (5 mol %) at -20 °C for 24 hours.

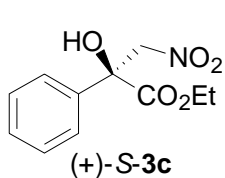

**(+)-S-2-Hydroxy-3-nitro-2-phenyl-propionic acid ethyl ester (3c)**

This product was obtained as a colorless oil in 96% yield after flash chromatography (elution gradient: ethyl acetate/hexane=1/19) and 95 % ee as determined by HPLC analysis [Daicel chiralcel OD, hexanes:IPA, 80:20, 1.0 ml/min, λ 220 nm, *t* (major) = 7.49 min, *t* (minor) = 9.46 min] from a reaction catalyzed by QD-1d (5 mol%) at -20 °C for 35 hours.  $[\alpha]_D^{25} = +28.4$  (c 1.05, CHCl<sub>3</sub>); <sup>1</sup>H NMR (400 MHz, CDCl<sub>3</sub>) δ 7.62-7.60 (m, 2H), 7.43-7.40 (m, 3H), 5.26 (d, *J* = 14.0 Hz, 1H), 4.68 (d, *J* = 14.0 Hz, 1H), 4.44-4.31 (m, 2H), 4.22 (s, 1H), 1.34 (dt, *J* = 1.2 Hz, 7.2 Hz, 3H); <sup>13</sup>C NMR (100 MHz, CDCl<sub>3</sub>) δ 171.6, 136.4, 129.0, 128.8, 125.2, 80.7, 75.9, 63.5, 13.8; these data are in agreement with those reported in literature.<sup>4</sup>

**The absolute configuration of (+)-3c was determined to be S by converting 3c into β-lactam 5c and comparing the value of the specific rotation of 5c with that reported in the literature.** (for details see below preparation of β-lactam 5c part).

**(-)-R-2-Hydroxy-3-nitro-2-phenyl-propionic acid ethyl ester (3c)** This product was obtained as a colorless oil in 96% yield and 93% ee from a reaction catalyzed by Q-1d (5 mol %) at -20 °C for 46 hours.

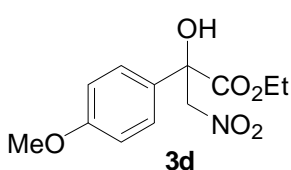

**(+)-2-Hydroxy-2-(4-methoxy-phenyl)-3-nitro-propionic acid ethyl ester (3d)** This product was obtained as a white solid in 86% yield after flash chromatography (elution gradient: ethyl acetate/hexane=1/10) and 94% ee as determined by HPLC

analysis [Daicel chiralpak AS, hexanes:IPA, 80:20, 1.0 ml/min,  $\lambda$  220 nm, t (major) = 10.90min, t (minor) = 13.49 min] from a reaction catalyzed by QD-1d (5 mol%) at -20 °C for 96 hours. M.p.: 70-73 °C;  $[\alpha]_D^{25} = + 26.9$  (c 1.25, CHCl<sub>3</sub>); <sup>1</sup>H NMR (400 MHz, CDCl<sub>3</sub>)  $\delta$  7.51 (d, *J* = 8.8 Hz, 2H), 6.91 (d, *J* = 8.8 Hz, 2H), 5.22 (d, *J* = 14.4 Hz, 1H), 4.41-4.31 (m, 2H), 4.65 (d, *J* = 14.4 Hz, 1H), 4.17 (s, 1H), 3.82 (s, 3H), 1.34 (t, *J* = 6.8 Hz, 3H); <sup>13</sup>C NMR (100 MHz, CDCl<sub>3</sub>)  $\delta$  171.8, 160.1, 128.3, 126.6, 114.2, 80.8, 75.7, 63.5, 55.3, 13.9; these data are in agreement with those reported in lit.<sup>4</sup>

**(-)-2-Hydroxy-2-(4-methoxy-phenyl)-3-nitro-propionic acid ethyl ester (3d)** This product was obtained as a colorless oil in 84% yield and 97% ee from a reaction catalyzed by Q-1d (5 mol %) at -20 °C for 96 hours.

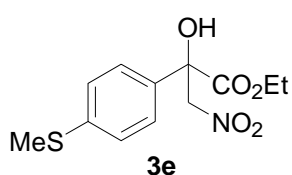

**(+)- 2-Hydroxy-2-(4-methylsulfanyl-phenyl)-3-nitro-propionic acid ethyl ester (3e)** This product was obtained as a white solid in 86% yield after flash chromatography (elution gradient: ethyl acetate/hexane=1/7) and 96% ee as determined

by HPLC analysis [Daicel chiralcel OD, hexanes:IPA, 80:20, 1.0 ml/min,  $\lambda$  220 nm, t (major) = 8.84 min, t (minor) = 12.15 min] from a reaction catalyzed by QD-1d (5.0 mol%) at -20 °C for 72 hours. M.p.: 84-86 °C;  $[\alpha]_D^{25} = + 29.7$  (c 1.1, CHCl<sub>3</sub>); <sup>1</sup>H NMR (400 MHz, CDCl<sub>3</sub>)  $\delta$  7.51 (dd, *J* = 2.0 Hz, 6.8 Hz, 2H), 7.25 (d, *J* = 6.8 Hz, 2H), 5.22 (d, *J* = 14.4 Hz, 1H), 4.65 (d, *J* = 14.4 Hz, 1H), 4.43-4.30 (m, 2H), 4.19 (s, 1H), 2.49 (s, 3H), 1.34 (t, *J* = 7.2 Hz, 3H); <sup>13</sup>C NMR (100 MHz, CDCl<sub>3</sub>)  $\delta$  171.5, 140.2, 132.8, 126.2, 126.6,

80.6, 75.7, 63.6, 15.3, 13.9; IR (CHCl<sub>3</sub>)  $\nu$  3484, 2984, 2924, 1736, 1559, 1493, 1378, 1226; HRMS (ESI)  $m/z$  calcd for (C<sub>12</sub>H<sub>15</sub>NO<sub>5</sub>S + Na<sup>+</sup>): 308.0569, found: 308.0571.

**(-)-2-Hydroxy-2-(4-methylsulfonyl-phenyl)-3-nitro-propionic acid ethyl ester (3e)**

This product was obtained as a colorless oil in 86 % yield and 96 % ee from a reaction catalyzed by Q-1d (5 mol %) at -20 °C for 72 hours.

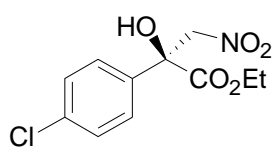

**(+)-S-3f**

**(+)-S-2-(4-Chloro-phenyl)-2-hydroxy-3-nitro-propionic acid ethyl ester (3f)**

This product was obtained as a colorless oil in 98 % yield after flash chromatography (elution gradient: ethyl acetate/hexane =1/15) and 97 % ee as determined by HPLC analysis [Daicel chiralcel OD, hexanes:IPA, 85:15, 1.0 ml/min,  $\lambda$  220 nm,  $t$  (major) = 7.67 min,  $t$  (minor) = 9.17 min] from a reaction catalyzed by QD-1d (5 mol%) at -20 °C for 12 hours.  $[\alpha]_D^{25} = + 24.4$  (c 1.1, CHCl<sub>3</sub>); <sup>1</sup>H NMR (400 MHz, CDCl<sub>3</sub>)  $\delta$  7.56 (td,  $J = 2.4$  Hz, 8.8 Hz, 2H), 7.39 (td,  $J = 2.4$  Hz, 8.8 Hz, 2H), 5.22 (d,  $J = 14.0$  Hz, 1H), 4.64 (d,  $J = 14.0$  Hz, 1H), 4.44-4.31 (m, 2H), 4.24 (s, 1H), 1.34 (t,  $J = 7.2$  Hz, 3H); <sup>13</sup>C NMR (100 MHz, CDCl<sub>3</sub>)  $\delta$  171.2, 135.2, 134.9, 129.0, 126.7, 80.5, 75.6, 63.7, 13.8; these data are in agreement with those reported in lit.<sup>4</sup>

**The absolute configuration of (+)-3f was determined to be S by comparing the specific rotation with that of literature data.**  $[\alpha]_D^{25} = + 21.7$  (c 1.0, CH<sub>2</sub>Cl<sub>2</sub>) for 96% ee [lit.<sup>4</sup>  $[\alpha]_D^{23} = -17.5$  (c 1.02, CH<sub>2</sub>Cl<sub>2</sub>) 88 % ee for *R* isomer ].

**(-)-R-2-(4-Chloro-phenyl)-2-hydroxy-3-nitro-propionic acid ethyl ester (3f)** This product was obtained as a colorless oil in 96% yield and 96% ee from a reaction catalyzed by Q-1d (5 mol %) at -20 °C for 12 hours.

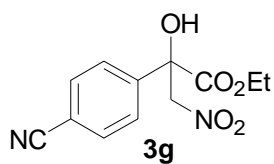

**(+)-2-(4-Cyano-phenyl)-2-hydroxy-3-nitro-propionic acid ethyl ester (3g)**

This product was obtained as a white solid in 96% yield after flash chromatography (elution gradient: ethyl acetate/hexane=1/6) and 94% ee as determined by HPLC analysis [Daicel chiralpak AD, hexanes:IPA, 80:20, 0.9 ml/min,  $\lambda$  220 nm, t (major) = 15.44 min, t (minor) = 13.99 min] from a reaction catalyzed by QD-1d (5 mol%) at -20 °C for 9 hours. M.p.: 97-100 °C;  $[\alpha]_D^{25} = + 24.9$  (c 1.05, CHCl<sub>3</sub>); <sup>1</sup>H NMR (400 MHz, CDCl<sub>3</sub>)  $\delta$  7.78 (d, *J* = 8.4 Hz, 2H), 7.72 (d, *J* = 8.4 Hz, 2H), 5.23 (d, *J* = 14.0 Hz, 1H), 4.65 (d, *J* = 14.0 Hz, 1H), 4.47-4.33 (m, 2H), 4.32 (s, 1H), 1.36 (t, *J* = 7.2 Hz, 3H); <sup>13</sup>C NMR (100 MHz, CDCl<sub>3</sub>)  $\delta$  170.6, 141.3, 132.6, 126.3, 118.0, 113.3, 80.3, 75.7, 64.2, 13.9; IR (CHCl<sub>3</sub>)  $\nu$  3475 (br), 2985, 2232, 1741, 1561, 1502, 1378, 1229; HRMS (CI) m/z calcd for (C<sub>12</sub>H<sub>12</sub>N<sub>2</sub>O<sub>5</sub> + H<sup>+</sup>): 265.0824, found: 265.0831.

**(-)-2-(4-Cyano-phenyl)-2-hydroxy-3-nitro-propionic acid ethyl ester (3g)** This product was obtained as a colorless oil in 98% yield and 97% ee from a reaction catalyzed by Q-1d (5 mol %) at -20 °C for 11 hours.

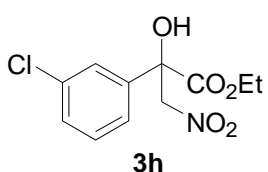

**(+)-2-(3-Chloro-phenyl)-2-hydroxy-3-nitro-propionic acid ethyl ester (3h)**

This product was obtained as a colorless oil in 91 % yield after flash chromatography (elution gradient: ethyl acetate/hexane=1/15) and 95 % ee as determined by HPLC analysis [Daicel chiralcel OD, hexanes:IPA, 85/15, 1.0 ml/min,  $\lambda$  220 nm, t (major) = 7.86 min, t (minor) = 10.15 min] from a reaction catalyzed by QD-1d (5 mol%) at -20 °C for 11 hours.  $[\alpha]_D^{25} = + 25.2$  (c 1.1, CHCl<sub>3</sub>); <sup>1</sup>H NMR (400 MHz, CDCl<sub>3</sub>)  $\delta$  7.64 (d, *J* = 1.6 Hz, 1H), 7.51-7.47 (m, 1H), 7.38-7.32 (m, 2H), 5.22 (d, *J* = 14.8 Hz, 1H), 4.65 (d, *J* = 14.8 Hz, 1H), 4.46-4.33 (m, 2H), 4.25 (s, 1H), 1.36 (t, *J* = 7.2 Hz, 3H); <sup>13</sup>C NMR (100 MHz, CDCl<sub>3</sub>)  $\delta$  171.1, 138.3, 135.0, 130.1, 129.3, 125.7, 123.4, 80.5, 75.6, 63.9, 13.9; IR (CHCl<sub>3</sub>)  $\nu$  3486 (br), 3073, 2984, 2926, 1739, 1562, 1475, 1416, 1377, 1227; HRMS (ESI) m/z calcd for (C<sub>11</sub>H<sub>12</sub>ClNO<sub>5</sub> + Na<sup>+</sup>): 296.0302, found: 296.0300.

**(-)-2-(3-Chloro-phenyl)-2-hydroxy-3-nitro-propionic acid ethyl ester (3h)** This product was obtained as a colorless oil in 96% yield and 95% ee from a reaction catalyzed by Q-1d (5 mol %) at -20 °C for 11 hours.

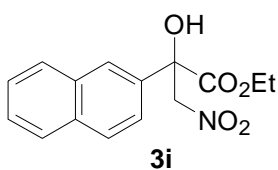

**(+)-2-Hydroxy-2-naphthalen-2-yl-3-nitro-propionic acid ethyl ester (3i)** This product was obtained as a white solid in 96% yield after flash chromatography (elution gradient: ethyl acetate/hexane=1/19) and 94% ee as determined by HPLC analysis [Daicel chiralcel OD, hexanes:IPA, 60:40, 1.0 ml/min,  $\lambda$  280 nm, t(major) = 7.60 min, t(minor) = 19.91 min] from a reaction catalyzed by QD-1d (5 mol%) at -20 °C for 60 hours. M.p.: 75-77 °C;  $[\alpha]_D^{25} = + 47.6$  (c 1.1, CHCl<sub>3</sub>); <sup>1</sup>H NMR (400 MHz, CDCl<sub>3</sub>)  $\delta$  8.12 (s, 1H), 7.89-7.84 (m, 3H), 7.67 (dd,  $J = 2.0$  Hz, 8.8 Hz, 1H), 7.56-7.52 (m, 2H), 5.39 (d,  $J = 14.0$  Hz, 1H), 4.76 (d,  $J = 14.0$ Hz, 1H), 4.46-4.33 (m, 2H), 4.34 (s, 1H), 1.36 (t,  $J = 7.2$  Hz, 3H); <sup>13</sup>C NMR (100 MHz, CDCl<sub>3</sub>)  $\delta$ 171.6, 133.6, 133.2, 132.9, 128.7, 128.4, 127.5, 127.0, 126.7, 125.0, 122.3, 80.7, 76.2, 63.6, 13.9; IR (CHCl<sub>3</sub>)  $\nu$  3487 (br), 3059, 2983, 1738, 1560, 1415, 1377, 1270, 1224, 1133; HRMS (CI) m/z calcd for (C<sub>15</sub>H<sub>15</sub>NO<sub>5</sub><sup>+</sup>): 289.0950, found: 289.0942.

**(-)-2-Hydroxy-2-naphthalen-2-yl-3-nitro-propionic acid ethyl ester (3i)** This product was obtained as a colorless oil in 97% yield and 94% ee from a reaction catalyzed by Q-1d (5.0 mol %) at -20 °C for 60 hours.

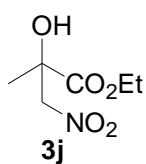

**(-)-2-Hydroxy-2-methyl-3-nitro-propionic acid ethyl ester (3j)** This product was obtained as a colorless oil in 89% yield after flash chromatography (elution gradient: ethyl acetate/hexane=1/6) and 95% ee as determined by HPLC analysis [Daicel chiralpak AS, hexanes:IPA, 95:5, 1.0 ml/min,  $\lambda$  215 nm, t (major) = 16.90 min, t (minor) = 19.93 min] from a reaction catalyzed by QD-1d (5 mol%) at -20 °C for 12 hours.  $[\alpha]_D^{25} = - 5.1$  (c 1.0, CHCl<sub>3</sub>); <sup>1</sup>H NMR (400 MHz, CDCl<sub>3</sub>)  $\delta$  4.84 (d,  $J = 14.0$  Hz, 1H), 4.56 (d,  $J = 14.0$  Hz, 1H), 4.40-

4.28 (m, 2H), 3.73 (s, 1H), 1.46 (s, 3H), 1.34 (t,  $J = 7.2$  Hz, 3H);  $^{13}\text{C}$  NMR (100 MHz,  $\text{CDCl}_3$ )  $\delta$  173.5, 80.9, 72.4, 63.0, 23.8, 13.9; these data are in agreement with those reported in lit.<sup>4</sup>

**(+)-2-Hydroxy-2-methyl-3-nitro-propionic acid ethyl ester (3j)** This product was obtained as a colorless oil in 90% yield and 95% ee from a reaction catalyzed by **Q-1d** (5.0 mol %) at  $-20^\circ\text{C}$  for 12 hours.

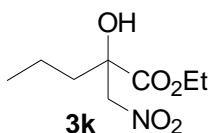

**(-)-2-Hydroxy-2-nitromethyl-pentanoic acid ethyl ester (3k)** This product was obtained as a colorless oil in 90% yield after flash chromatography (elution gradient: ethyl acetate/hexane=1/15) and 93% ee as determined by HPLC analysis [Daicel chiralpak AS, hexanes:IPA, 90:10, 1.0 ml/min,  $\lambda$  215 nm,  $t$  (major) = 8.75 min,  $t$  (minor) = 10.84 min] from a reaction catalyzed by **QD-1d** (5.0 mol%) at  $-20^\circ\text{C}$  for 17 hours.  $[\alpha]_{\text{D}}^{25} = -14.0$  (c 1.15,  $\text{CHCl}_3$ );  $^1\text{H}$  NMR (400 MHz,  $\text{CDCl}_3$ )  $\delta$  4.82 (d,  $J = 13.2$  Hz, 1H), 4.56 (d,  $J = 13.2$  Hz, 1H), 4.41-4.29 (m, 2H), 3.70 (s, 1H), 1.72-1.59 (m, 2H), 1.57-1.45 (m, 1H), 1.34 (t,  $J = 7.2$  Hz, 3H), 1.26-1.14 (m, 1H), 0.93 (t,  $J = 7.2$  Hz, 3H);  $^{13}\text{C}$  NMR (100 MHz,  $\text{CDCl}_3$ )  $\delta$  172.9, 80.8, 75.2, 62.9, 38.6, 16.0, 14.0, 13.8; IR ( $\text{CHCl}_3$ )  $\nu$  3505 (br), 2967, 2937, 1739, 1561, 1467, 1380, 1234, 1162; HRMS (CI)  $m/z$  calcd for ( $\text{C}_8\text{H}_{15}\text{NO}_5 + \text{H}^+$ ): 206.1028, found: 206.1023.

**(-)-2-Hydroxy-2-nitromethyl-pentanoic acid ethyl ester (3k)** This product was obtained as a colorless oil in 90% yield and 93% ee from a reaction catalyzed by **Q-1d** (5.0 mol %) at  $-20^\circ\text{C}$  for 15 hours.

**(-)-2-Hydroxy-2-nitromethyl-4-phenyl-butyric acid ethyl ester (3l)** This product was obtained as a colorless oil in 88 % yield after flash chromatography (elution gradient: ethyl acetate/hexane=1/15) and 95% ee as determined by HPLC analysis [Daicel chiralpak AS, hexanes:IPA, 90:10, 1.0 ml/min,  $\lambda$  220 nm,  $t$  (major) = 10.75 min,  $t$  (minor) = 14.79 min] from a reaction catalyzed by **QD-1d** (5 mol%) at  $-20^\circ\text{C}$  for 14 hours.

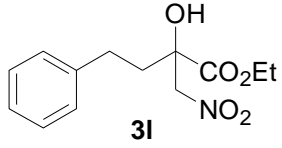
CCOC(=O)C(O)(CN)Cc1ccccc1
**3l**

$[\alpha]_D^{25} = -18.8$  (c 1.5, CHCl<sub>3</sub>); <sup>1</sup>H NMR (400 MHz, CDCl<sub>3</sub>) δ 7.31-7.14 (m, 5H), 4.83 (d, *J* = 13.2 Hz, 1H), 4.58 (d, *J* = 13.2 Hz, 1H), 4.39-4.25 (m, 2H), 3.82 (s, 1H), 2.86-2.79 (m, 1H), 2.53-2.45 (m, 1H), 2.06-1.92 (m, 2H), 1.34 (t, *J* = 7.2 Hz, 3H); <sup>13</sup>C NMR (100 MHz, CDCl<sub>3</sub>) δ 172.6, 140.1, 128.5, 128.2, 126.2, 80.7, 74.9, 63.0, 38.1, 28.9, 14.0; these data are in agreement with those reported in lit.<sup>4</sup>

**(+)-2-Hydroxy-2-nitromethyl-4-phenyl-butyric acid ethyl ester (3l)** This product was obtained as a colorless oil in 89% yield and 94% ee from a reaction catalyzed by **Q-1d** (5.0 mol %) at -20 °C for 11 hours.

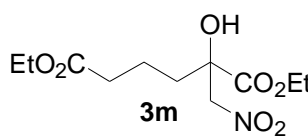
CCOC(=O)CCCC(O)(CN)C(=O)OCC
**3m**

**(-)-2-Hydroxy-2-nitromethyl-hexanedioic acid diethyl ester (3m)** This product was obtained as a colorless oil in 87% yield after flash chromatography (elution gradient: ethyl acetate/hexane=1/5) and 94% ee as determined by HPLC analysis [Daicel chiralcel OJ, hexanes:IPA, 70:30, 1.0 ml/min, λ 215 nm, t (major) = 17.23min, t (minor) = 12.00 min] from a reaction catalyzed by **QD-1d** (5 mol%) at -20 °C for 15 hours.  $[\alpha]_D^{25} = -5.3$  (c 1.15, CHCl<sub>3</sub>); <sup>1</sup>H NMR (400 MHz, CDCl<sub>3</sub>) δ 4.82 (d, *J* = 14.0 Hz, 1H), 4.57 (d, *J* = 14.0 Hz, 1H), 4.43-4.30 (m, 2H), 4.13 (q, *J* = 7.2 Hz, 2H), 3.75 (s, 1H), 2.37-2.26 (m, 2H), 1.86-1.73 (m, 2H), 1.70-1.64 (m, 1H), 1.59-1.49 (m, 1H), 1.35 (t, *J* = 6.8 Hz, 3H), 1.25 (t, *J* = 7.2 Hz, 3H); <sup>13</sup>C NMR (100 MHz, CDCl<sub>3</sub>) δ 172.7, 172.6, 80.7, 75.0, 63.1, 60.4, 35.6, 33.5, 18.2, 14.1, 14.0; IR (CHCl<sub>3</sub>) ν 3492 (br), 2983, 2939, 1733, 1560, 1419, 1379, 1224; HRMS (ESI) *m/z* calcd for (C<sub>11</sub>H<sub>19</sub>NO<sub>7</sub> + Na<sup>+</sup>): 300.1059, found: 300.1053.

**(+)-2-Hydroxy-2-nitromethyl-hexanedioic acid diethyl ester (3m)** This product was obtained as a colorless oil in 86% yield and 93% ee from a reaction catalyzed by **Q-1d** (5 mol %) at -20 °C for 11 hours.

## Concise Asymmetric Syntheses of $\beta$ -lactam **5**, aziridines **7** and $\alpha$ -methylcysteine derivative **8** from nitroaldol products **3**:

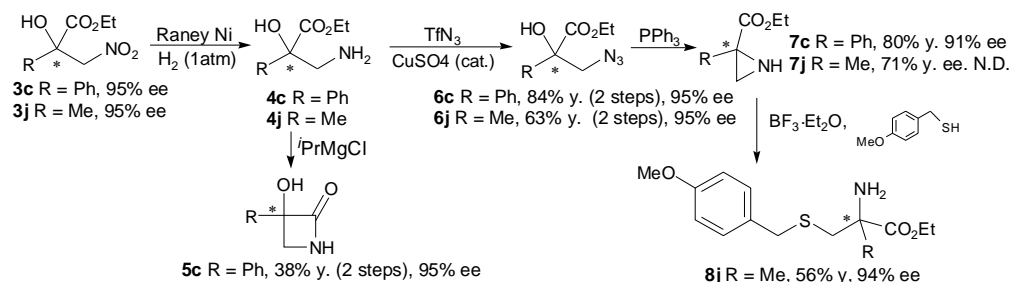

### Synthesis of 3-phenyl-3-hydroxyazetid-2-one (**5c**):<sup>4, 5</sup>

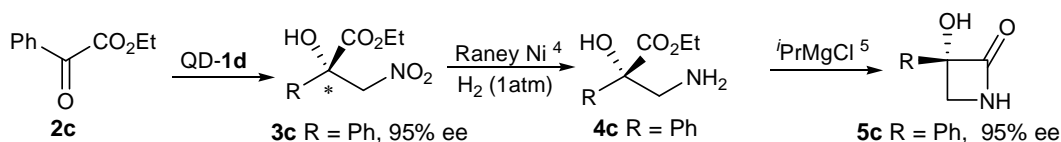

At  $-20\text{ }^{\circ}\text{C}$ , to a solution of  $\alpha$ -ketoester **2c** (1.136g, 6.38 mmol), nitromethane (3.4 mL) in  $\text{CH}_2\text{Cl}_2$  (6.4 mL) was added catalyst **QD-1d** (132 mg, 5.0 mol%). The resulting mixture was kept at  $-20\text{ }^{\circ}\text{C}$  for 40 hours when TLC showed **2c** was completely consumed. The reaction mixture was directly subjected to silica gel flash chromatography (EA/Hexanes = 1/15) to furnish **3c** as a clear oil (1.503g, 98% yield) and in 95% ee. The column was washed with MeOH and the catalyst **1d** was recovered almost quantitatively ( $> 131$  mg). The recovered catalyst was shown to be identical to that before the reaction by NMR analysis.

To a solution of **3c** (1.04g, 4.35mmol) obtained from reactions using **QD-1d** in EtOH (25 mL) was added Raney nickel (1.0 g in 10 mL). The resulting reaction mixture was stirred under  $\text{H}_2$  at atmospheric pressure for 4 h at room temperature. After the starting material



was completely consumed (monitored by TLC), the reaction mixture was passed through a short pad of celite and the celite was then washed with EtOH (2 x 10 mL). The filtrate was concentrated in vacuo and the residue **4c** was used in next step without further purification (864 mg, 95% yield).

At 0 °C, to a solution of **4c** (113 mg, 0.54 mmol) in anhydrous THF (2.0 mL) was added <sup>i</sup>PrMgCl (2.0 M in THF, 1.35 mL, 2.7 mmol) dropwisely via a syringe. The resulting reaction mixture was stirred at room temperature for 19 hours. The reaction was quenched with NH<sub>4</sub>Cl aq. (sat. 10.0 mL) and extracted with ethyl acetate (50 mL). The organic phase was washed with brine and dried over anhydrous Na<sub>2</sub>SO<sub>4</sub>. The solvent was removed in vacuo and the residue was purified by flash chromatography (ethyl acetate:hexanes = 1.5:1) to give **5c** as a white powder (36 mg, 37% yield over 3 steps from **2c**). The ee of **5c** was determined to be 95% by HPLC analysis (chiralcel OD, IPA/Hexane = 95/5, 1.0 ml/min, 220 nm, t(major) = 32.27 min, t(minor) = 28.73 min). M.p.: 127-130 °C; [α]<sub>D</sub><sup>25</sup> = - 107° (c: 0.27 in CHCl<sub>3</sub>) {lit.<sup>5</sup> [α]<sub>D</sub><sup>23</sup> = - 57.4°, (c: 0.25 in CHCl<sub>3</sub>) for 80% ee, *S* isomer}. The absolute configuration of **5c** is therefore determined to be *S*, which indicate that the absolute configuration of **3c** obtained with QD-**1d** is *S*. <sup>1</sup>H NMR (400 MHz, CDCl<sub>3</sub>) δ 7.48-7.45 (m, 2H), 7.36-7.26 (m, 3H), 6.89 (br, 1H), 3.56 (d, *J* = 5.6 Hz, 1H), 3.47 (d, *J* = 5.6 Hz, 1H); <sup>13</sup>C NMR (100 MHz, CDCl<sub>3</sub>) δ 171.9, 138.0, 128.6, 128.4, 125.3, 86.9, 54.1. The data is consistent with those reported in the literature.<sup>5</sup>

*Synthesis of Propionic acid 2-azido-1-hydroxy-1-phenyl-ethyl ester (6c):*<sup>6</sup>

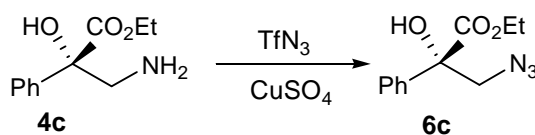

A mixture of NaN<sub>3</sub> (1.76g, 27 mmol), water (4 mL) and CH<sub>2</sub>Cl<sub>2</sub> (2 mL) was cooled to 0 °C in an ice-water bath. To this mixture under vigorous stirring, Tf<sub>2</sub>O (0.75 mL, 4.5

mmol) was added dropwise via a syringe. The resulting mixture was stirred at 0 °C for 3 h and 1 mL of water was added to the reaction mixture, after which the aqueous and organic phase was separated. The organic phase was collected, and the aqueous phase was extracted with CH<sub>2</sub>Cl<sub>2</sub> (2 mL). The combined organic phase was washed with sat. aqueous NaHCO<sub>3</sub> (5 mL), after which it was used for the reaction with **4c**.

At room temperature, to a solution of crude **4c** (341 mg, 1.6 mmol, derived from hydrogenation of **3c** as described above) in CH<sub>2</sub>Cl<sub>2</sub> (1.5 mL) was added Et<sub>3</sub>N (0.63 mL, 4.8 mmol) and an aqueous solution of CuSO<sub>4</sub> (12 mg in 0.25 mL of water) consecutively. To the resulting mixture, a solution of TfN<sub>3</sub> in CH<sub>2</sub>Cl<sub>2</sub> freshly prepared as described above was added. This is followed by the addition of MeOH (around 1 mL), and the reaction mixture became homogenous. The reaction mixture was stirred at room temperature for 2.5 hours, after which it was poured into sat. NaHCO<sub>3</sub> aq. (20 mL). The resulting mixture was extracted with CH<sub>2</sub>Cl<sub>2</sub> (2 x 40 mL). The combined organic phase was washed with brine and dried over anhydrous Na<sub>2</sub>SO<sub>4</sub>. The solvent was removed in vacuo and the residue was purified by chromatography (silica gel, ethyl acetate/hexanes = 1/20) to give **6c** as a clear oil (339 mg, 88% yield, 84% yield over 2 steps from **3c**). The ee of **6c** was determined to be 96% by HPLC analysis (chiralcel OJ, IPA/Hexanes = 90/10, 1.0 mL/min, 220nm, t(minor)=10.03 min, t(major)=13.17 min). [ $\alpha$ ]<sub>D</sub><sup>25</sup> = -30 ° (c: 1.1 in CHCl<sub>3</sub>); <sup>1</sup>H NMR (400 MHz, CDCl<sub>3</sub>)  $\delta$  7.60 (d, *J* = 6.8 Hz, 2H), 7.40-7.32 (m, 3H), 4.39-4.25 (m, 2H), 4.01 (s, 1H), 3.84 (d, *J* = 12.4 Hz, 1H), 3.62 (d, *J* = 12.4 Hz, 1H), 1.33 (t, *J* = 7.2 Hz, 3H); <sup>13</sup>C NMR (100 MHz, CDCl<sub>3</sub>)  $\delta$  172.8, 138.3, 128.5, 125.3, 79.3, 63.1, 58.4, 14.0; IR (CHCl<sub>3</sub>)  $\nu$  3496, 3063, 2984, 2102, 1732, 1448, 1250; HRMS (ESI) *m/z* calcd for (C<sub>11</sub>H<sub>13</sub>N<sub>3</sub>O<sub>3</sub> + Na<sup>+</sup>): 258.0855, found: 258.0860.

*Synthesis of 2-Phenyl-aziridine-2-carboxylic acid ethyl ester (7c):*<sup>7</sup>

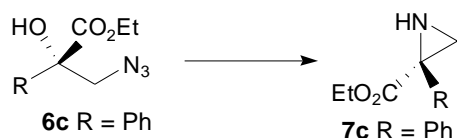

To a solution of **6c** (300 mg, 1.27 mmol) in anhydrous CH<sub>3</sub>CN (8.0 mL) was added PPh<sub>3</sub> (501 mg, 1.9 mmol) at room temperature. The mixture was stirred at room temperature for 1.0 h and then refluxed for 14 h under Ar atmosphere. The solvent was removed in vacuo and the residue was purified by chromatography (ethyl acetate/hexanes = 1/15) to give **7c** as a clear oil (196 mg, 80% yield). The ee of **7c** was determined to be 91% ee by HPLC (chiralpak AS plus *R,R*-Whelko, IPA/Hexanes = 90/10, 1.0 ml/min, 220 nm, t(major)= 11.20 min, t(minor)=12.59 min).  $[\alpha]_D^{25} = -7.4^\circ$  (c: 1.0 in CHCl<sub>3</sub>); <sup>1</sup>H NMR (400 MHz, CDCl<sub>3</sub>) δ 7.49-7.44 (m, 2H), 7.35-7.27 (m, 3H), 4.26-4.12 (m, 2H), 2.51 (dd, *J* = 2.0 Hz, 10.4 Hz, 1H), 2.00-1.91 (m, 2H), 1.22 (t, *J* = 7.2 Hz, 3H); <sup>13</sup>C NMR (100 MHz, CDCl<sub>3</sub>) δ 173.0, 136.3, 129.1, 127.9, 127.6, 62.2, 41.2, 35.2, 13.9; 3290, 2984, 1717, 1306, 1195; HRMS (CI) *m/z* calcd for (C<sub>11</sub>H<sub>13</sub>NO<sub>2</sub> + H<sup>+</sup>): 192.1024, found: 192.1018.

*Synthesis of azide 3-Azido-2-hydroxy-2-methyl-propionic acid ethyl ester (6j):*<sup>4,6</sup>

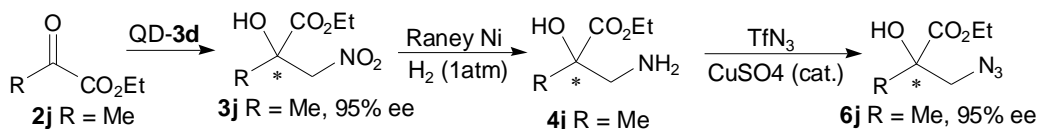

At -20 °C, to a solution of α-ketoester **2j** (580 mg, 5 mmol), nitromethane (2.7 mL) in CH<sub>2</sub>Cl<sub>2</sub> (5 mL) was added catalyst QD-**1d** (104 mg, 5 mol%). The resulting mixture was kept at -20 °C for 13 hours and TLC showed **2j** is completely consumed. The reaction mixture was directly subjected to silica gel flash chromatography (EA/Hexanes = 1/15) to give **3j** as a clear oil (830 mg, 94% yield). The ee of **3j** was determined to be 95%. The

column was washed with MeOH and the catalyst was recovered almost quantitatively (> 103 mg). The recovered catalyst was shown to be identical to that before the reaction by NMR analysis.

To a solution of **3j** (800 mg, obtained with QD-**1d** in 95% ee) in EtOH (20 mL) was added Raney nickel (1.5 g in 10 mL). The reaction mixture was stirred under H<sub>2</sub> at atmospheric pressure for 4 h at room temperature. After the starting material was completely consumed (monitored by TLC), the reaction mixture was passed through a short pad of celite and celite was washed with EtOH (2 x 10 mL). The filtrate was concentrated in vacuo and the residue **4j** was used directly in next step (600 mg, 90% crude yield).

A solution of NaN<sub>3</sub> (3.5 g, 54 mmol) in water (8 mL) and CH<sub>2</sub>Cl<sub>2</sub> (3 mL) was cooled to 0 °C in an ice-water bath. To this solution under vigorous stirring, Tf<sub>2</sub>O (1.51 mL, 9 mmol) was added dropwise via a syringe. The reaction mixture was stirred at 0 °C for 3 h, after which the mixture was diluted with water (2 mL). The aqueous and organic phases were separated. The organic phase was collected and the aqueous phase was extracted with CH<sub>2</sub>Cl<sub>2</sub> (3 mL). The combined organic phase was washed with sat. NaHCO<sub>3</sub> aq. (10 mL). This solution was used for the next step.

At room temperature, to a solution of **4j** (475 mg, crude from **3j** as described before) in CH<sub>2</sub>Cl<sub>2</sub> (3 mL) was added Et<sub>3</sub>N (1.25 mL) and a solution of CuSO<sub>4</sub> (24 mg in 0.5 mL H<sub>2</sub>O) consecutively. To the resulting mixture, a freshly prepared solution of TfN<sub>3</sub> in CH<sub>2</sub>Cl<sub>2</sub> as described above was added. This is followed by the addition of MeOH (around 2.0 mL) after which the solution became homogenous. The resulting mixture was stirred at room temperature for 2.5 hours. The reaction mixture was poured into sat. NaHCO<sub>3</sub> aq. (30 mL). The resulting mixture was extracted with CH<sub>2</sub>Cl<sub>2</sub> (2 x 50 mL). The combined organic phase was washed with brine and dried over anhydrous Na<sub>2</sub>SO<sub>4</sub>. The solvent was removed in vacuo and the residue was purified by chromatography (silica gel, petroleum ether/ether = 9/1) to give **6j** as a clear oil (390 mg, 70% yield, 59% yield over 3 steps from **2j**). The ee of **6j** was determined to be 95% by HPLC analysis: Daicel

chiralpak AS, Hexane:IPA, 97:3, 1.0 mL/min,  $\lambda$  215 nm  $t(\text{major})= 8.40$  min,  $t(\text{minor})= 9.52$  min);  $[\alpha]_{\text{D}}^{25} = - 83.3^{\circ}$  (c: 1.0 in  $\text{CHCl}_3$ );  $^1\text{H}$  NMR (400 MHz,  $\text{CDCl}_3$ )  $\delta$  4.31-4.25 (m, 2H), 3.51 (s, 1H), 3.47-3.40 (m, 2H), 1.41 (s, 3H), 1.32 (t,  $J = 6.8$  Hz, 3H);  $^{13}\text{C}$  NMR (100 MHz,  $\text{CDCl}_3$ )  $\delta$  174.7, 75.1, 62.5, 58.4, 23.3, 14.0; IR ( $\text{CHCl}_3$ )  $\nu$  3503, 2985, 2939, 2105, 1733, 1456, 1258.

*(Cautious: the product is very volatile, be careful when remove solvent in vacuo)*

**Synthesis of aziridine 2-Methyl-aziridine-2-carboxylic acid ethyl ester (7j):**

7

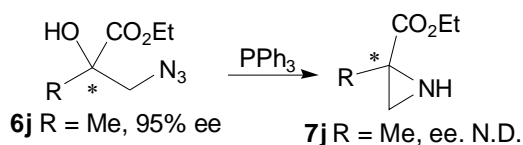

To a solution of **6j** (188 mg, 1.09 mmol) in anhydrous  $\text{CH}_3\text{CN}$  (4 mL) was added  $\text{PPh}_3$  (427 mg, 1.6 mmol) at room temperature. The mixture was stirred at r.t. for 1 h and then refluxed for 9 h under Ar atmosphere. The solvent was removed in vacuo and the residue was purified by chromatography (silica gel, petroleum ether/ether = 5/1) to give **7j** as a clear oil (99 mg, 71% yield).  $[\alpha]_{\text{D}}^{25} = - 28^{\circ}$  (c: 0.5 in  $\text{CHCl}_3$ );  $^1\text{H}$  NMR (400 MHz,  $\text{CDCl}_3$ )  $\delta$  4.20 (dq,  $J = 1.6$  Hz, 7.2 Hz, 2H), 2.17 (d,  $J = 10.4$  Hz, 1H), 1.64 (d,  $J = 4.8$  Hz, 1H), 1.42 (s, 3H), 1.29 (t,  $J = 7.2$  Hz, 3H);  $^{13}\text{C}$  NMR (100 MHz,  $\text{CDCl}_3$ )  $\delta$  174.2, 53.4, 34.7, 34.1, 17.9, 14.0; IR ( $\text{CHCl}_3$ )  $\nu$  3294, 3070, 2983, 2940, 1724, 1325, 1199; HRMS (CI)  $m/z$  calcd for ( $\text{C}_6\text{H}_{11}\text{NO}_2 + \text{H}^+$ ): 130.0868, found: 130.0867.

*(Cautious: the product is very volatile, be extremely careful when remove solvent in vacuo)*

**Synthesis of 2-Amino-3-(4-methoxy-benzylsulfanyl)-2-methyl-propionic acid ethyl ester (8j):**<sup>7</sup>

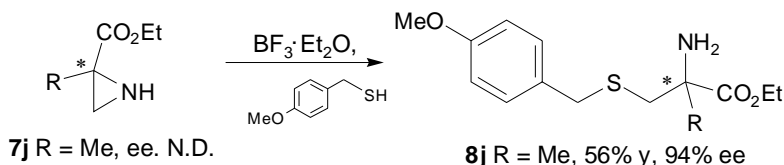

At 0 °C, to the solution of **7j** (65 mg, 0.5 mmol) in CH<sub>2</sub>Cl<sub>2</sub> (1.5 mL) was added *p*-methoxybenzyl mercaptan (0.21 mL, 1.5 mmol) and boron trifluoride diethyl etherate (0.11 mL). The resulting mixture was stirred at 0 °C for 12 h followed by stirring at room temperature for 24 h. The reaction mixture was poured into sat. NaHCO<sub>3</sub> aq. (20 mL) and the mixture was extracted with ethyl acetate (2 x 30 mL). The combined organic phase was washed with brine, dried over anhydrous Na<sub>2</sub>SO<sub>4</sub>. The solvent was removed and the residue was purified by chromatography (silica gel, petroleum ether/ethyl acetate = 2/1) to give **8j** as a clear oil (80 mg, 56% yield) in 94% ee (determined by HPLC: Daicel chiralcel OD, Hexane:IPA, 80:20, 0.5 mL/min, λ 254 nm, t (minor) = 14.56 min, t (major) = 15.22 min).  $\alpha]_D^{25} = -12^\circ$  (c: 1.05 in CHCl<sub>3</sub>); <sup>1</sup>H NMR (400 MHz, CDCl<sub>3</sub>) δ 7.23 (d, *J* = 8.4 Hz, 2H), 6.84 (d, *J* = 8.4 Hz, 2H), 4.20-4.14 (m, 2H), 3.79 (s, 3H), 3.70 (s, 2H), 2.92 (d, *J* = 13.2 Hz, 1H), 2.59 (d, *J* = 13.2 Hz, 1H), 1.85 (br, 2H), 1.34 (s, 3H), 1.28 (t, *J* = 7.2 Hz, 3H); <sup>13</sup>C NMR (100 MHz, CDCl<sub>3</sub>) δ 176.3, 158.6, 130.1, 129.9, 113.8, 61.2, 58.6, 55.2, 42.0, 37.1, 26.3, 14.1; IR (CHCl<sub>3</sub>) ν 3373, 2978, 2933, 1731, 1610, 1512, 1249; HRMS (ESI) *m/z* calcd for (C<sub>14</sub>H<sub>21</sub>NO<sub>3</sub>S + H<sup>+</sup>): 284.1320, found: 284.1315.

#### References:

- 1) Jesen, K. B.; Thorhauge, J.; Hazell, R. G.; Jørgensen, K. A. *Angew. Chem. Int. Ed.* **2001**, *40*, 160-163.
- 2) (a) Li, H.; Wang, Y.; Tang, L.; Deng, L. *J. Am. Chem. Soc.* **2004**, *126*, 9906-9907.  
(b) Li, H.; Wang, Y.; Tang, L.; Wu, F.; Liu, X.; Guo, C.; Foxman, B. M.; Deng L. *Angew. Chem. Int. Ed.* **2005**, *44*, 105-108. (c) Liu, X.; Li, H.; Deng, L. *Org. Lett.* **2005**, *7*, 167-169.
- 3) Iwabuchi, Y.; Nakatani, M.; Yokoyama, N.; Hatakeyama, S. *J. Am. Chem. Soc.* **1999**, *121*, 10219-10220.

- 4) (a) Christensen, C.; Juhl, K.; Jørgensen, K. A.; *Chem. Commun.* **2001**, 2222-2223.  
(b) Christensen, C.; Juhl, K.; Hazell, R. G.; Jørgensen, K. A. *J. Org. Chem.* **2002**, *67*, 4875-4881.
- 5) Nicewicz, D. A.; Yates, C. M.; Johnson, J. S. *J. Org. Chem.* **2004**, *69*, 6548-6555.
- 6) a) Liu, Q.; Tor, Y. *Org. Lett.* **2003**, *5*, 2571-2572. b) Nyffeler, P. T.; Liang, C.-H.; Koeller, K. M.; Wong, C.-H. *J. Am. Chem. Soc.* **2002**, *124*, 10773-10778.
- 7) Shao, H.; Zhu, Q.; Goodman, M. *J. Org. Chem.* **1995**, *60*, 790-791.

HPLC Conditions: Daicel chiralpak AD, Hexane:IPA, 90:10, 0.80 mL/min,  $\lambda$  215 nm

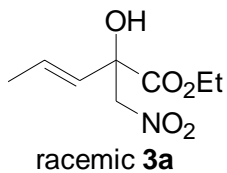

(+)-**3a** 96% ee  
Product obtained with QD-1d

(-)-**3a** 97% ee  
Product obtained with Q-1d

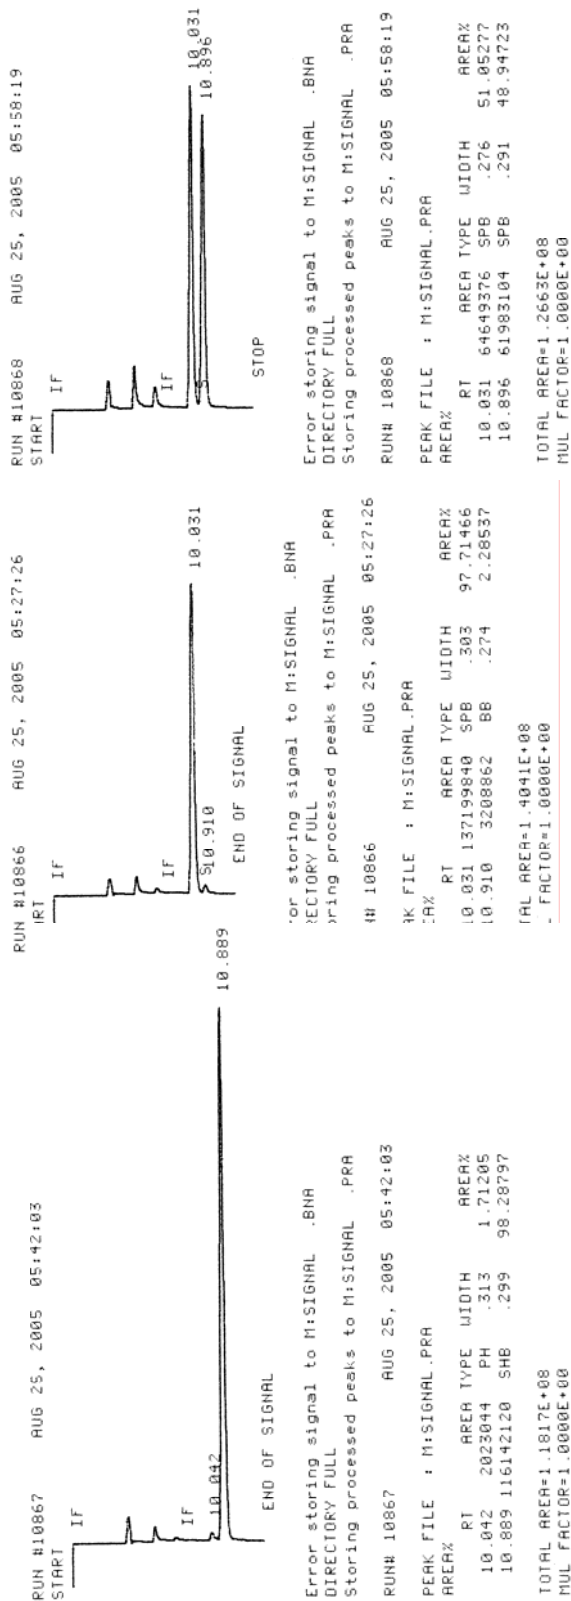



HPLC Conditions: Daicel chiralpak AD, Hexane:IPA, 90:10, 0.80 mL/min,  $\lambda$  215 nm

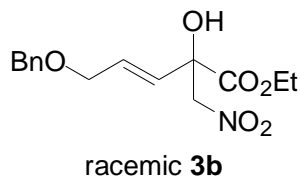

(+)-**3b** 94% ee  
Product obtained with QD-1d

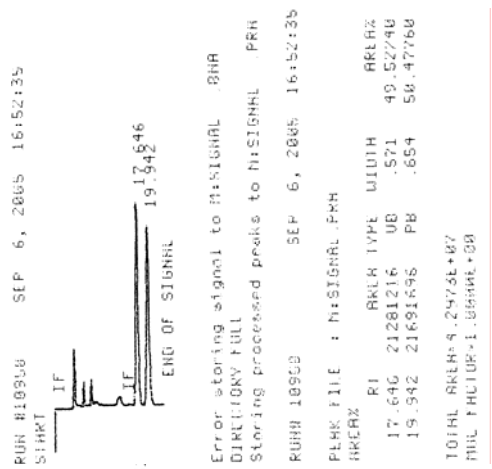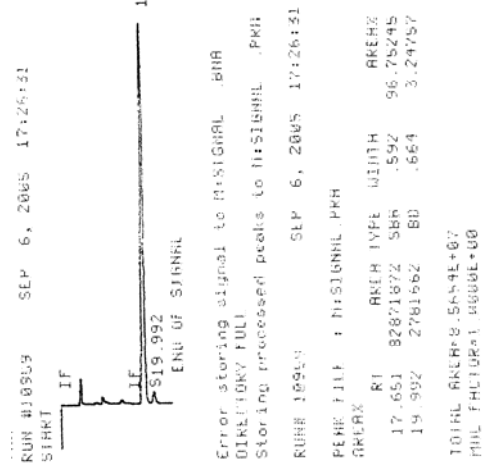

(-)-**3b** 95% ee  
Product obtained with Q-1d

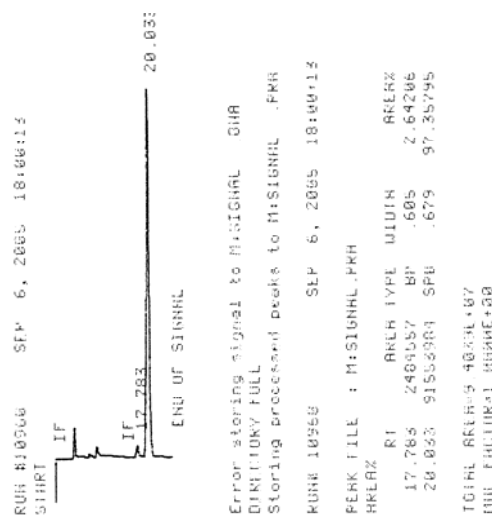

HPLC Conditions: Daicel chiralcel OD, Hexane:IPA, 80:20, 1.00 mL/min,  $\lambda$  220 nm

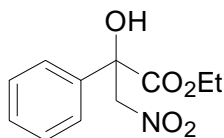

racemic **3c**

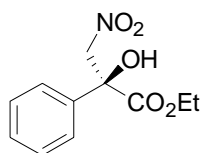

(+)-**S-3c** 95% ee  
Product obtained with **QD-1d**

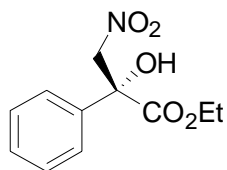

(-)-**R-3c** 93% ee  
Product obtained with **Q-1d**

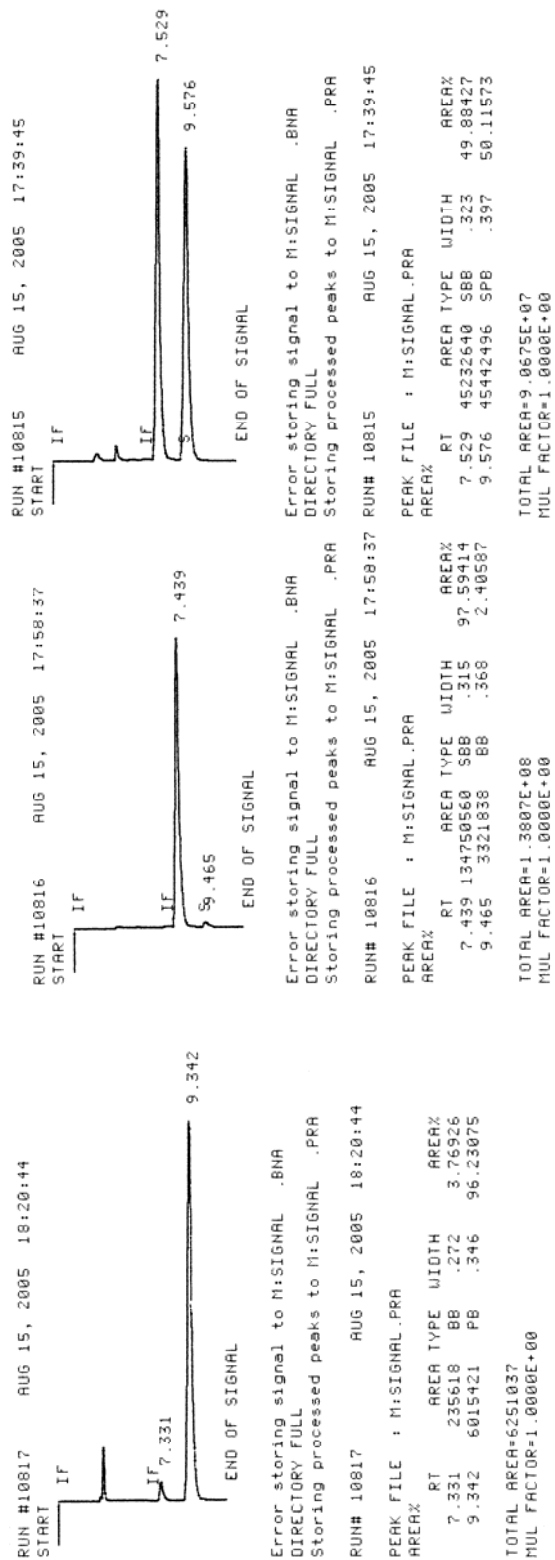

HPLC Conditions: Daicel chiralpak AS, Hexane:IPA, 85:15, 1.00 mL/min,  $\lambda$  220 nm

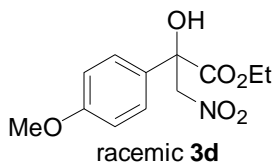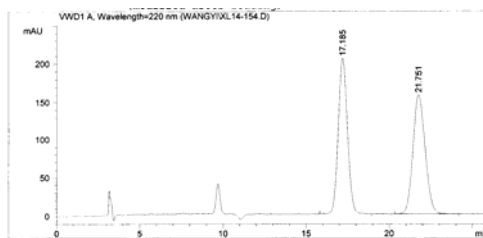

Area Percent Report

```

Sorted By      : Retention Time
Multiplier    : 1.0000
Dilution      : 1.0000
Sample Amount : 1.00000 [ng/ul] (not used in calc.)
Use Multiplier & Dilution Factor with ISTDs

Signal 1: VWD1 A, Wavelength=220 nm

Peak RetTime Sig Type Area Height Area
# [min]      : : : mAU *s [mAU] %
-----|-----|-----|-----|-----|-----|
1 17.185 1 BB 7831.73389 203.91719 49.7877
2 21.751 1 BB 7898.52197 156.73029 50.2123

Totals : 1.57303e4 360.64748
    
```

(+)-**3d** 94% ee  
Product obtained with QD-1d

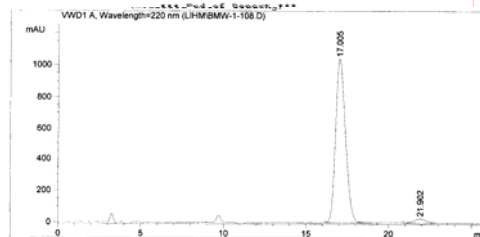

Area Percent Report

```

Sorted By      : Retention Time
Multiplier    : 1.0000
Dilution      : 1.0000
Sample Amount : 1.00000 [ng/ul] (not used in calc.)
Use Multiplier & Dilution Factor with ISTDs

Signal 1: VWD1 A, Wavelength=220 nm

Peak RetTime Sig Type Area Height Area
# [min]      : : : mAU *s [mAU] %
-----|-----|-----|-----|-----|-----|
1 17.005 1 BB 4.31829e4 1036.57471 97.0954
2 21.902 1 BB 1291.81970 26.09654 2.9046

Totals : 4.44748e4 1062.67125
    
```

(-)-**3d** 97% ee  
Product obtained with Q-1d

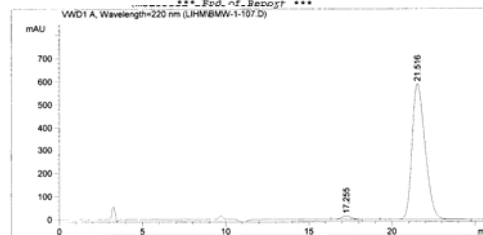

Area Percent Report

```

Sorted By      : Retention Time
Multiplier    : 1.0000
Dilution      : 1.0000
Sample Amount : 1.00000 [ng/ul] (not used in calc.)
Use Multiplier & Dilution Factor with ISTDs

Signal 1: VWD1 A, Wavelength=220 nm

Peak RetTime Sig Type Area Height Area
# [min]      : : : mAU *s [mAU] %
-----|-----|-----|-----|-----|-----|
1 17.255 1 BV 568.58990 14.34155 1.7449
2 21.516 1 VB 3.20168e4 588.83374 98.2551

Totals : 3.25854e4 603.17529

*** End of Report ***
    
```

HPLC Conditions: Daicel chiralcel OD, Hexane:IPA, 80:20, 1.00 mL/min,  $\lambda$  220 nm

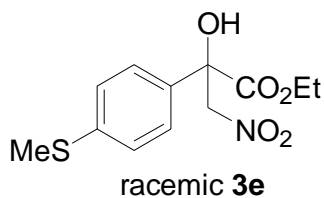

(+)-**3e** 96% ee  
Product obtained with QD-1d

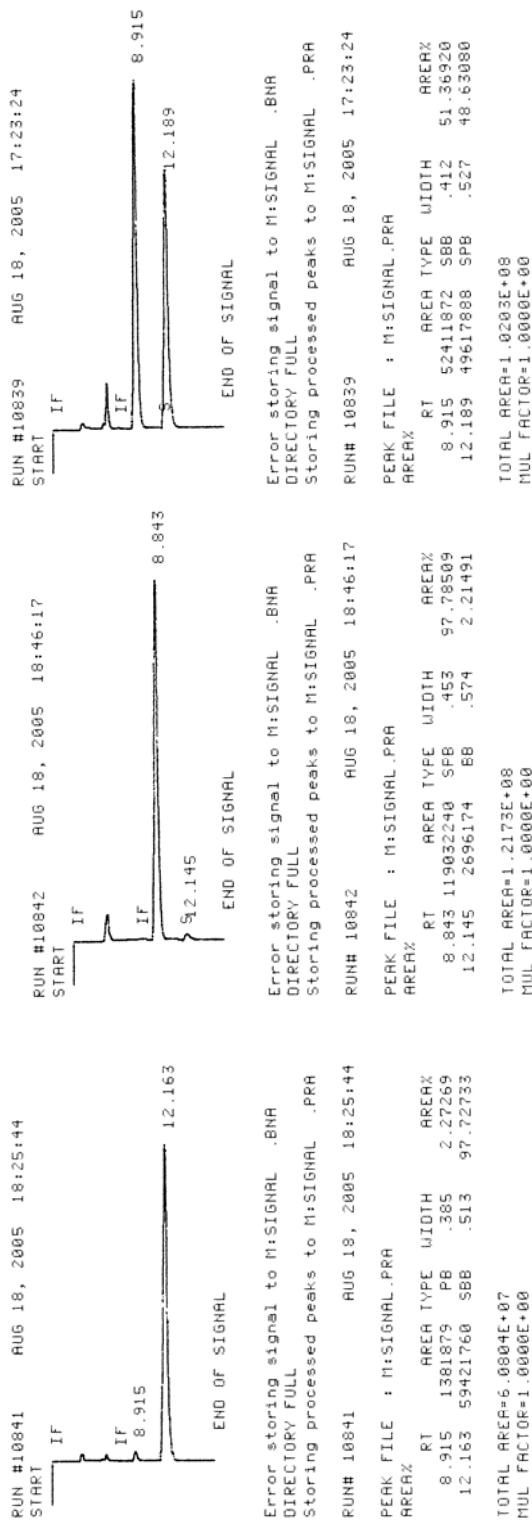

HPLC Conditions: Daicel chiralcel OD, Hexane:IPA, 85:15, 1.00 mL/min,  $\lambda$  220 nm

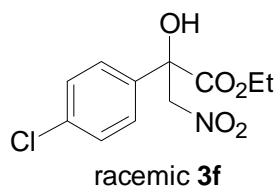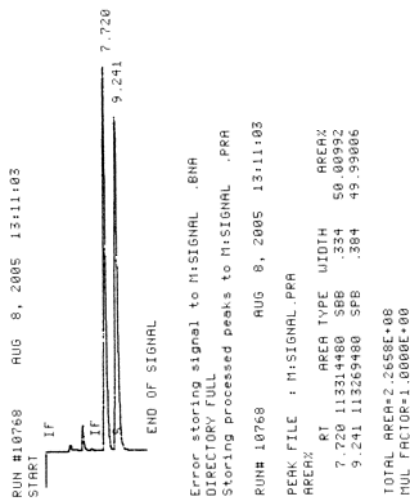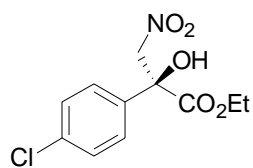

Product obtained with QD-1d

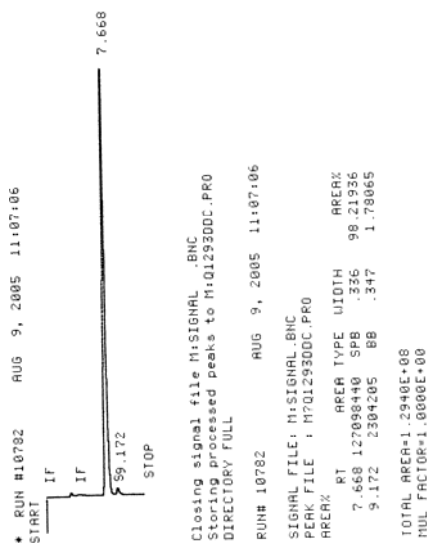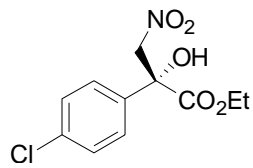

Product obtained with Q-1d

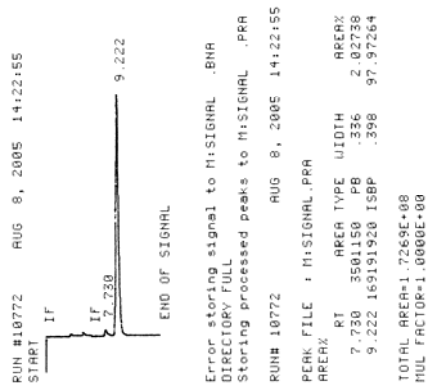

HPLC Conditions: Daicel chiralpak AD, Hexane:IPA, 80:20, 0.90 mL/min,  $\lambda$  220 nm

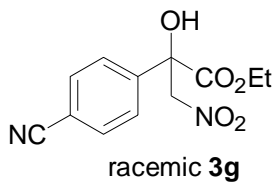

(+)-**3g** 94% ee  
Product obtained with QD-1d

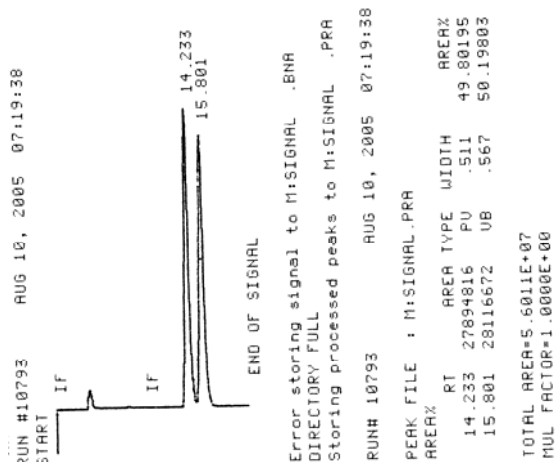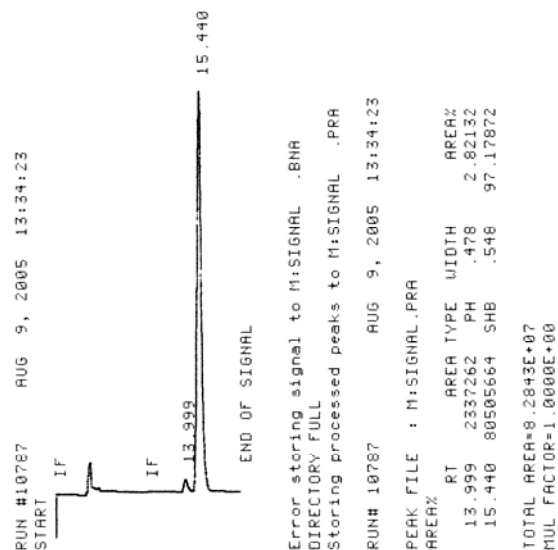

(-)-**3g** 97% ee  
Product obtained with Q-1d

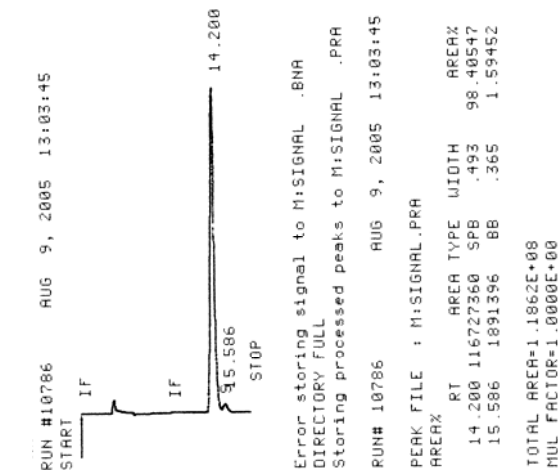

HPLC Conditions: Daicel chiralcel OD, Hexane:IPA, 85:15, 1.00 mL/min,  $\lambda$  220 nm

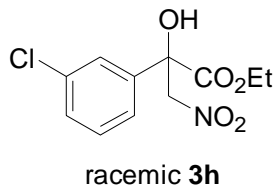

(+)-**3h** 95% ee  
Product obtained with QD-1d

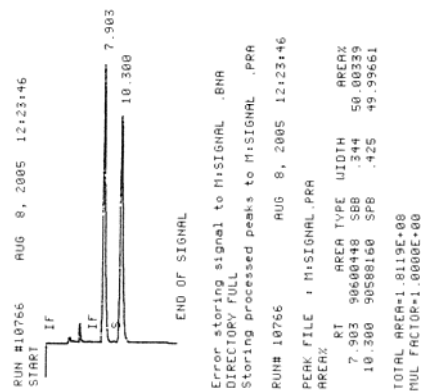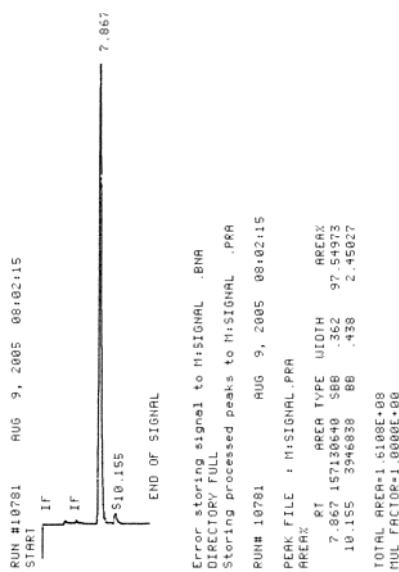

(-)-**3h** 95% ee  
Product obtained with Q-1d

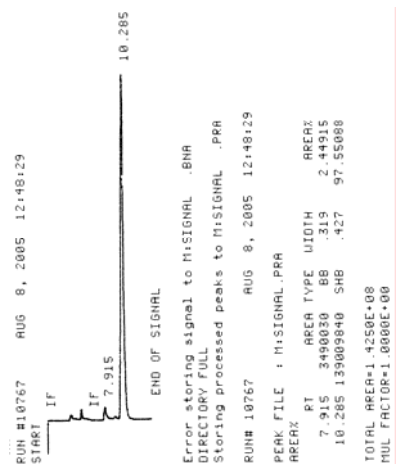

HPLC Conditions: Daicel chiralcel OD, Hexane:IPA, 60:40, 1.00 mL/min,  $\lambda$  280 nm

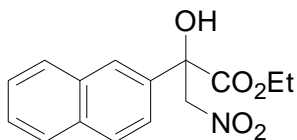

racemic **3i**

(+)-**3i** 94% ee  
Product obtained with QD-1d

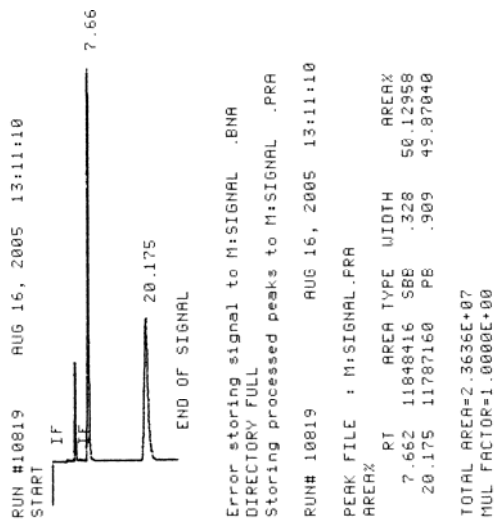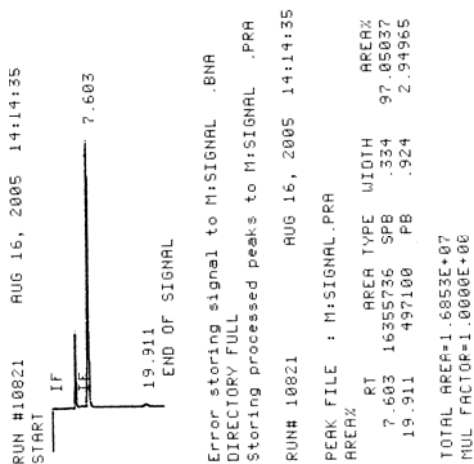

(-)-**3i** 94% ee  
Product obtained with Q-1d

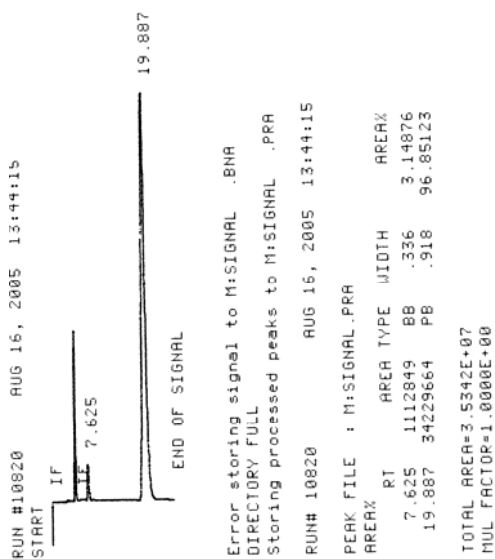



HPLC Conditions: Daicel chiralpak AS, Hexane:IPA, 95:5, 1.00 mL/min,  $\lambda$  215 nm

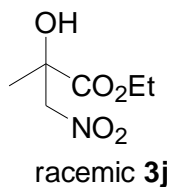

(-)-**3j** 95% ee  
Product obtained with QD-1d

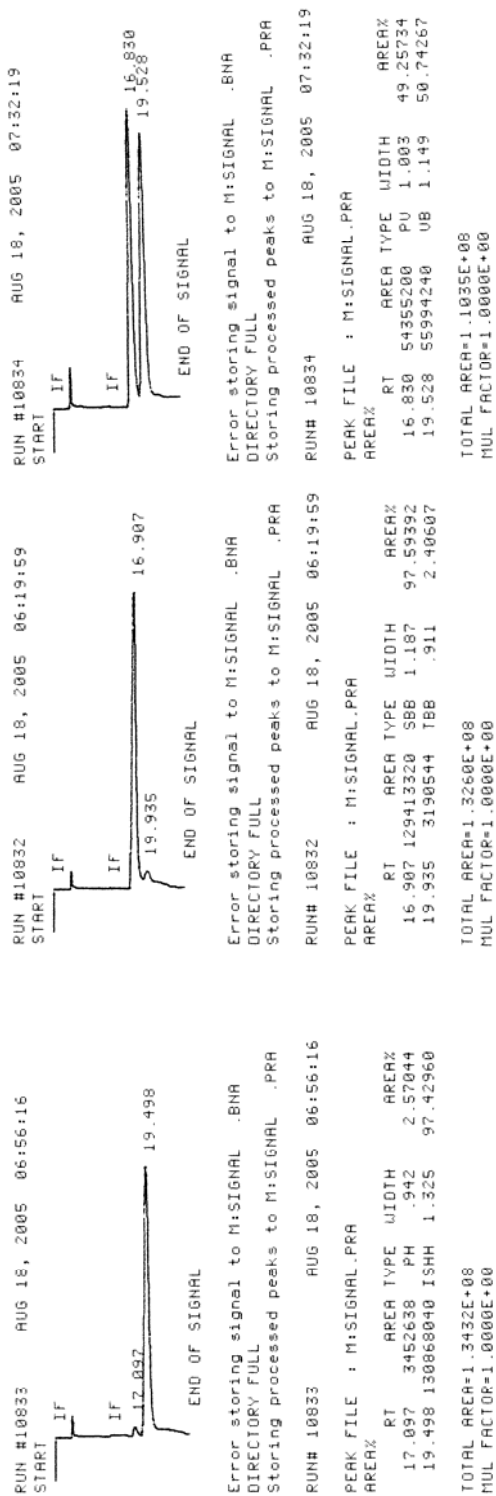

HPLC Conditions: Daicel chiralpak AS, Hexane:IPA, 90:10, 1.00 mL/min,  $\lambda$  215 nm

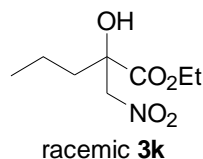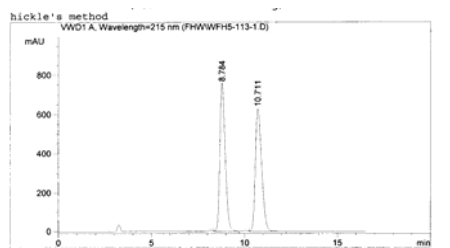

Area Percent Report

Sorted By : Retention Time  
Multiplier : 1.0000  
Dilution : 1.0000  
Sample Amount : 1.00000 [ng/ul] (not used in calc.)  
Use Multiplier & Dilution Factor with ISTDs

Signal 1: VWD1 A, Wavelength=215 nm

| Peak #   | RetTime [min] | Sig | Type | Area mAU *s | Height [mAU] | Area %  |
|----------|---------------|-----|------|-------------|--------------|---------|
| 1        | 8.784         | 1   | VV   | 1.52245e4   | 753.39691    | 50.4358 |
| 2        | 10.711        | 1   | VV   | 1.49614e4   | 628.23187    | 49.5642 |
| Totals : |               |     |      | 3.01859e4   | 1381.62878   |         |

(-)-**3k** 93% ee  
Product obtained with QD-1d

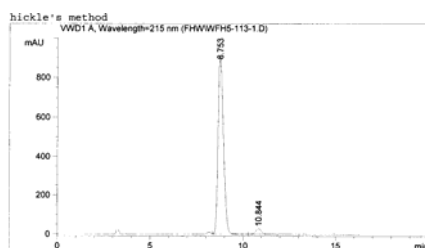

Area Percent Report

Sorted By : Retention Time  
Multiplier : 1.0000  
Dilution : 1.0000  
Sample Amount : 1.00000 [ng/ul] (not used in calc.)  
Use Multiplier & Dilution Factor with ISTDs

Signal 1: VWD1 A, Wavelength=215 nm

| Peak #   | RetTime [min] | Sig | Type | Area mAU *s | Height [mAU] | Area %  |
|----------|---------------|-----|------|-------------|--------------|---------|
| 1        | 8.753         | 1   | VV   | 1.84167e4   | 902.78381    | 96.6691 |
| 2        | 10.844        | 1   | VV   | 634.57745   | 28.33386     | 3.3309  |
| Totals : |               |     |      | 1.90512e4   | 931.11768    |         |

(+)-**3k** 93% ee  
Product obtained with QD-1d

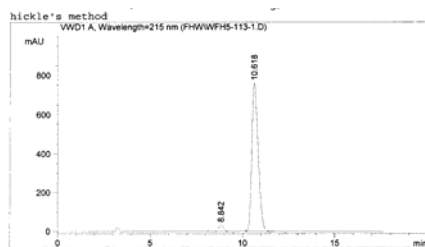

Area Percent Report

Sorted By : Retention Time  
Multiplier : 1.0000  
Dilution : 1.0000  
Sample Amount : 1.00000 [ng/ul] (not used in calc.)  
Use Multiplier & Dilution Factor with ISTDs

Signal 1: VWD1 A, Wavelength=215 nm

| Peak #   | RetTime [min] | Sig | Type | Area mAU *s | Height [mAU] | Area %  |
|----------|---------------|-----|------|-------------|--------------|---------|
| 1        | 8.842         | 1   | VV   | 662.42883   | 36.39874     | 3.4849  |
| 2        | 10.618        | 1   | VV   | 1.82462e4   | 762.05957    | 96.5151 |
| Totals : |               |     |      | 1.90086e4   | 798.45831    |         |

HPLC Conditions: Daicel chiralpak AS, Hexane:IPA, 90:10, 1.00 mL/min,  $\lambda$  220 nm

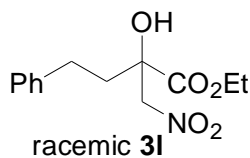

(-)-**3I** 95% ee  
Product obtained with QD-1d

(+)-**3I** 94% ee  
Product obtained with Q-1d

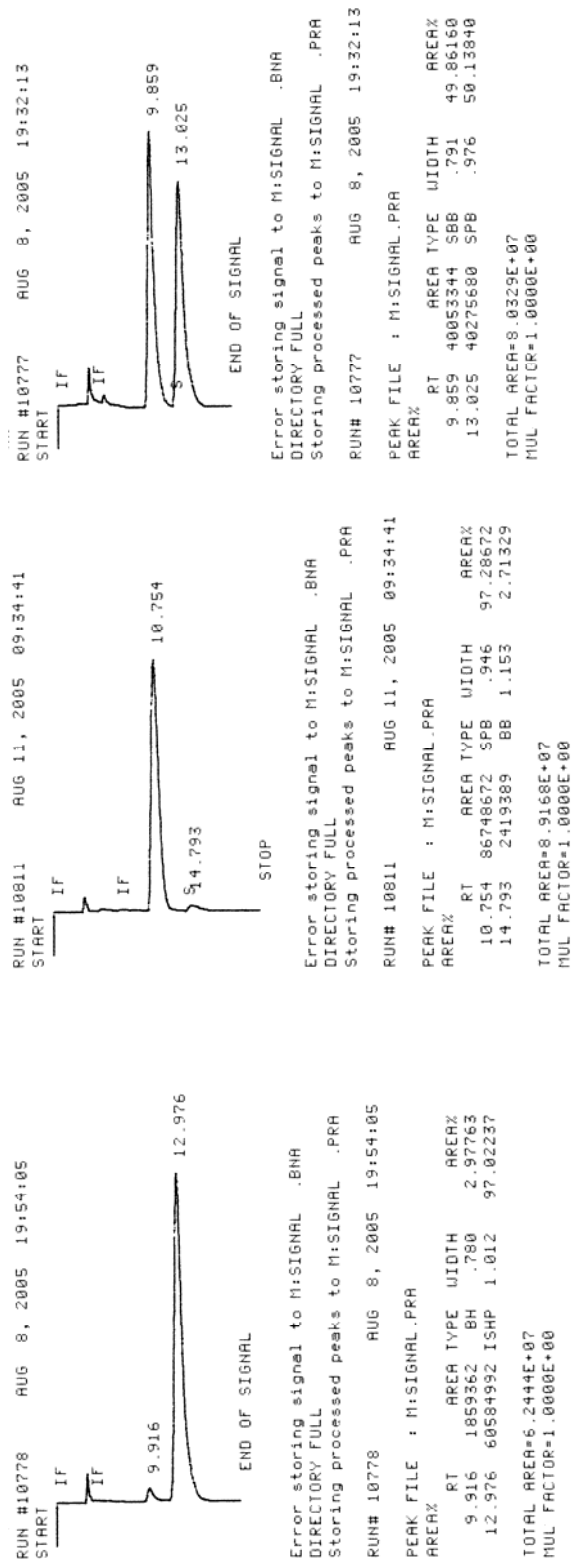

HPLC Conditions: Daicel chiralcel OJ, Hexane:IPA, 70:30, 1.0 mL/min,  $\lambda$  215 nm

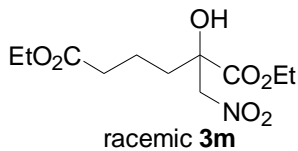

(-)-**3m** 94% ee  
 Product obtained with QD-1d

(+)-**3m** 93% ee  
 Product obtained with Q-1d

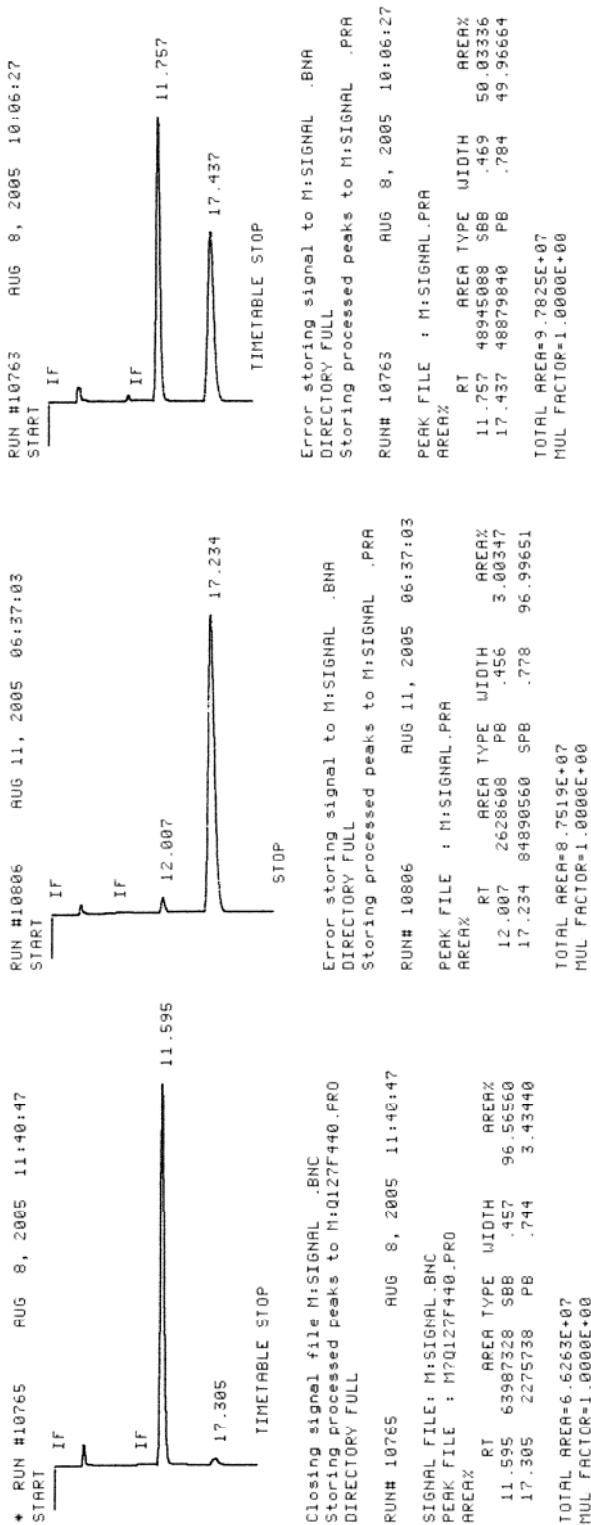

HPLC Conditions: Daicel chiralcel OD, Hexane:IPA, 95:5, 1.00 mL/min,  $\lambda$  220 nm

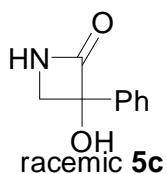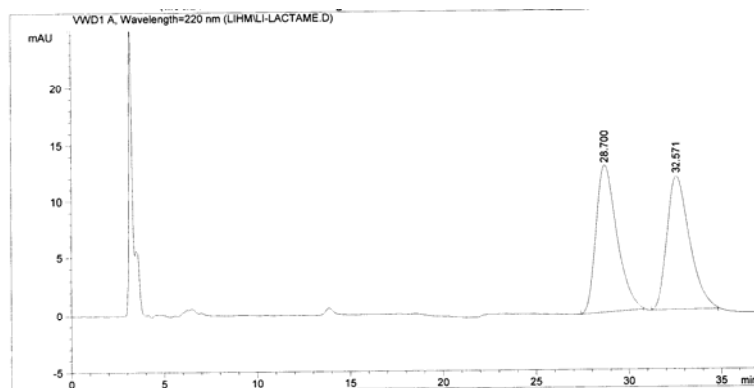

Signal 1: VWD1 A, Wavelength=220 nm

| Peak # | RetTime [min] | Type | Width [min] | Area mAU *s | Height [mAU] | Area %  |
|--------|---------------|------|-------------|-------------|--------------|---------|
| 1      | 28.700        | BB   | 1.1426      | 1006.38245  | 12.86675     | 50.5199 |
| 2      | 32.571        | BB   | 1.2364      | 985.66785   | 11.64612     | 49.4801 |

Totals : 1992.05029 24.51287

\*\*\* End of Report \*\*\*

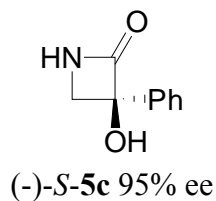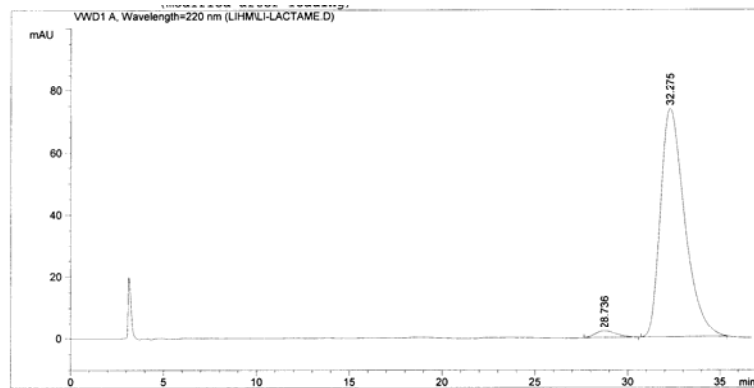

| Peak # | RetTime [min] | Type | Width [min] | Area mAU *s | Height [mAU] | Area %  |
|--------|---------------|------|-------------|-------------|--------------|---------|
| 1      | 28.736        | BB   | 0.9140      | 167.63673   | 2.17435      | 2.4255  |
| 2      | 32.275        | BB   | 1.3818      | 6743.72607  | 73.51411     | 97.5745 |

Totals : 6911.36281 75.68846

\*\*\* End of Report \*\*\*

HPLC Conditions: Daicel chiralcel OJ, Hexane:IPA, 90:10, 1.0 mL/min,  $\lambda$  220 nm

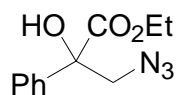

racemic **6c**

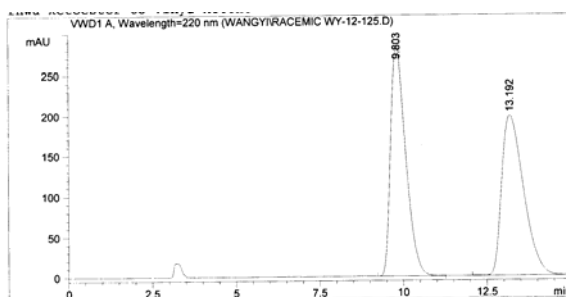

Area Percent Report

Sorted By : Retention Time  
Multiplier : 1.0000  
Dilution : 1.0000  
Sample Amount : 1.00000 [ng/ul] (not used in calc.)  
Use Multiplier & Dilution Factor with ISTDs

Signal 1: VWD1 A, Wavelength=220 nm

| Peak # | RetTime [min] | Sig | Type | Area mAU *s | Height [mAU] | Area %  |
|--------|---------------|-----|------|-------------|--------------|---------|
| 1      | 9.803         | 1   | VB   | 8949.16211  | 284.00308    | 49.8995 |
| 2      | 13.192        | 1   | BB   | 8985.20703  | 198.48335    | 50.1005 |

Totals : 1.79344e4 482.48643

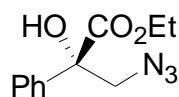

(-)-**5-6c** 96% ee

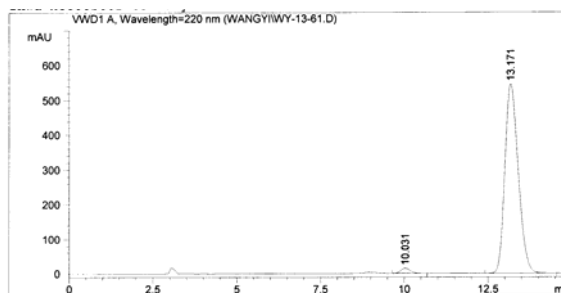

Area Percent Report

Sorted By : Retention Time  
Multiplier : 1.0000  
Dilution : 1.0000  
Sample Amount : 1.00000 [ng/ul] (not used in calc.)  
Use Multiplier & Dilution Factor with ISTDs

Signal 1: VWD1 A, Wavelength=220 nm

| Peak # | RetTime [min] | Sig | Type | Area mAU *s | Height [mAU] | Area %  |
|--------|---------------|-----|------|-------------|--------------|---------|
| 1      | 10.031        | 1   | BB   | 294.72345   | 14.97665     | 1.9095  |
| 2      | 13.171        | 1   | BB   | 1.51401e4   | 544.54773    | 98.0905 |

Totals : 1.54348e4 559.52438

HPLC Conditions: Daicel chiralpak AS plus (R, R)-whelk-O 1, Hexane:IPA, 90:10,  
1.0 mL/min,  $\lambda$  220 nm

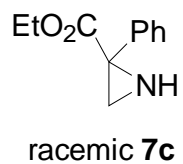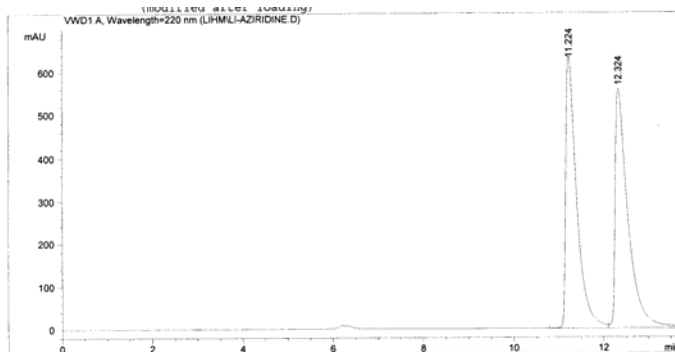

Area Percent Report

Sorted By : Signal  
Multiplier : 1.0000  
Dilution : 1.0000  
Sample Amount : 1.00000 [ng/ul] (not used in calc.)  
Use Multiplier & Dilution Factor with ISTDs

Signal 1: VWD1 A, Wavelength=220 nm

| Peak #   | RetTime [min] | Type | Width [min] | Area mAU  | %s | Height [mAU] | Area %  |
|----------|---------------|------|-------------|-----------|----|--------------|---------|
| 1        | 11.224        | BV   | 0.2501      | 1.07312e4 |    | 633.45020    | 49.2105 |
| 2        | 12.324        | VV   | 0.2890      | 1.10755e4 |    | 560.03827    | 50.7895 |
| Totals : |               |      |             | 2.18068e4 |    | 1193.48846   |         |

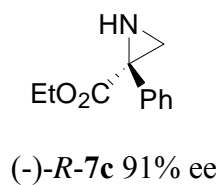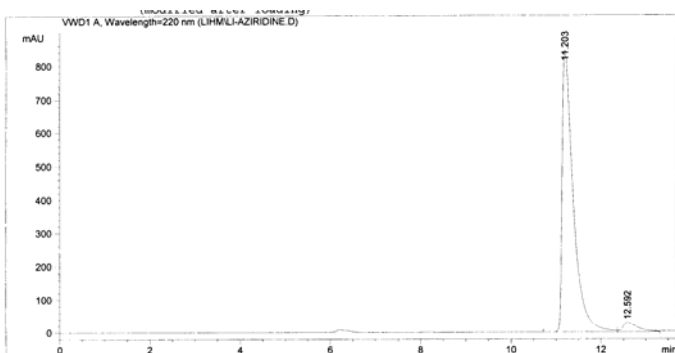

Area Percent Report

Sorted By : Signal  
Multiplier : 1.0000  
Dilution : 1.0000  
Sample Amount : 1.00000 [ng/ul] (not used in calc.)  
Use Multiplier & Dilution Factor with ISTDs

Signal 1: VWD1 A, Wavelength=220 nm

| Peak #   | RetTime [min] | Type | Width [min] | Area mAU  | %s | Height [mAU] | Area %  |
|----------|---------------|------|-------------|-----------|----|--------------|---------|
| 1        | 11.203        | VV   | 0.2542      | 1.45336e4 |    | 840.34460    | 95.4503 |
| 2        | 12.592        | VV   | 0.3295      | 692.74963 |    | 29.79496     | 4.5497  |
| Totals : |               |      |             | 1.52263e4 |    | 870.13956    |         |

HPLC Conditions: Daicel chiralpak AS, Hexane:IPA, 97:3, 1.0 mL/min,  $\lambda$  215 nm

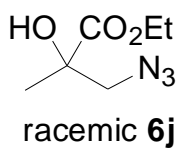

(-)-**6j** 95% ee

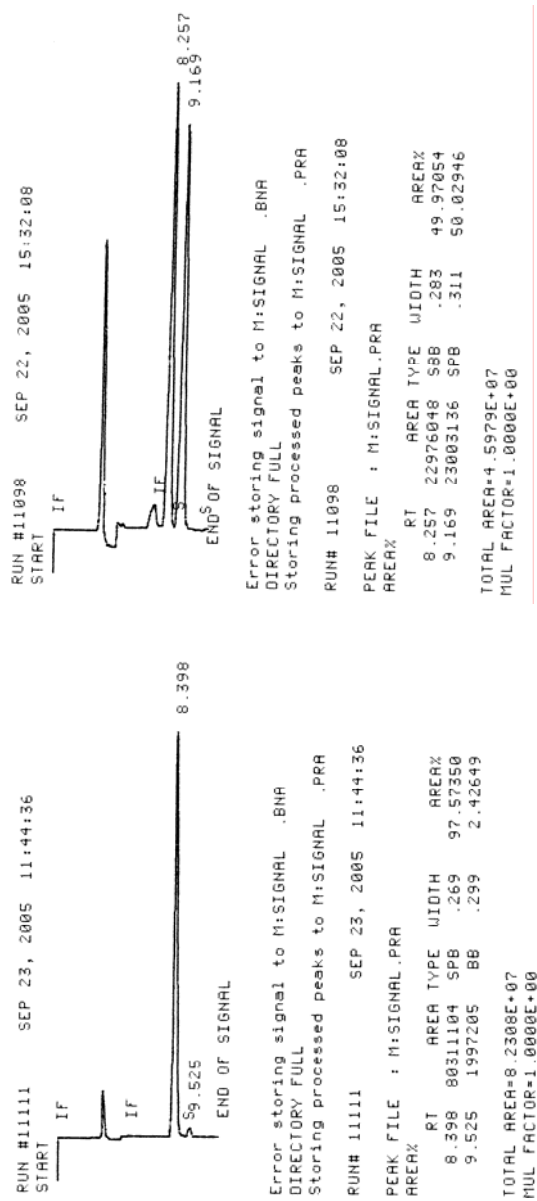



HPLC Conditions: Daicel chiralcel OD, Hexane:IPA, 80:20, 0.5 mL/min,  $\lambda$  254 nm

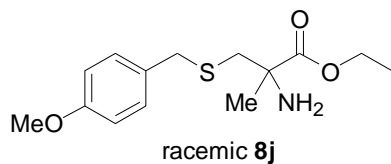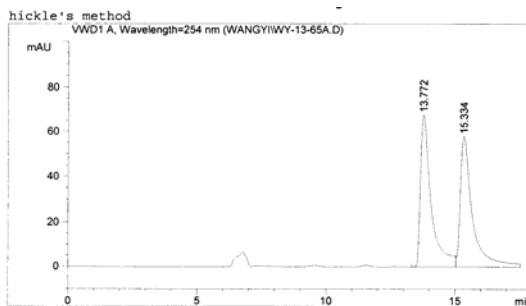

=====  
Area Percent Report  
=====

Sorted By : Retention Time  
Multiplier : 1.0000  
Dilution : 1.0000  
Sample Amount : 1.00000 [ng/ul] (not used in calc.)  
Use Multiplier & Dilution Factor with ISTDs

Signal 1: VWD1 A, Wavelength=254 nm

| Peak # | RetTime [min] | Sig | Type | Area mAU   | Area *s | Height [mAU] | Area %  |
|--------|---------------|-----|------|------------|---------|--------------|---------|
| 1      | 13.772        | 1   | BV   | 1961.92175 |         | 67.72769     | 50.8178 |
| 2      | 15.334        | 1   | VBA  | 1898.77490 |         | 57.90228     | 49.1822 |

Totals : 3860.69666 125.62997

(-)-**8j** 94% ee

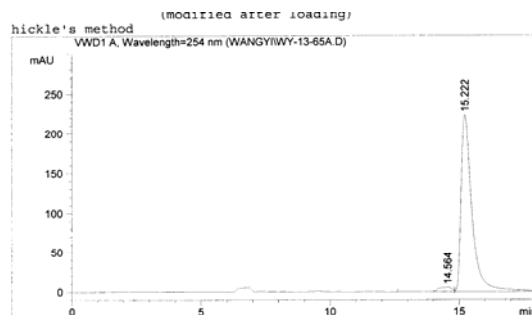

=====  
Area Percent Report  
=====

Sorted By : Retention Time  
Multiplier : 1.0000  
Dilution : 1.0000  
Sample Amount : 1.00000 [ng/ul] (not used in calc.)  
Use Multiplier & Dilution Factor with ISTDs

Signal 1: VWD1 A, Wavelength=254 nm

| Peak # | RetTime [min] | Sig | Type | Area mAU   | Area *s | Height [mAU] | Area %  |
|--------|---------------|-----|------|------------|---------|--------------|---------|
| 1      | 14.564        | 1   | BV   | 199.35370  |         | 5.47416      | 2.8939  |
| 2      | 15.222        | 1   | VBA  | 6689.34277 |         | 223.38412    | 97.1061 |

Totals : 6888.69647 228.85828

li-14-109-dmsc-h

Pulse Sequence: s2pul  
Solvent: DMSO  
Ambient temperature  
File: li-14-109-dmsc-h  
INOVA-500 "gamble"

Pulse 46.1 degrees  
Acq. time 1.638 sec  
Width 5000.0 Hz  
16 repetitions  
OBSERVE F1, 399.7551270 MHz  
DATA PROCESSING  
F1 size 16384  
Total time 0 min, 26 sec

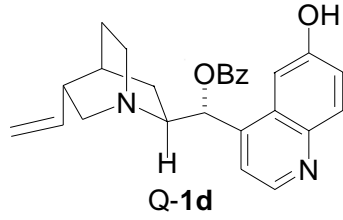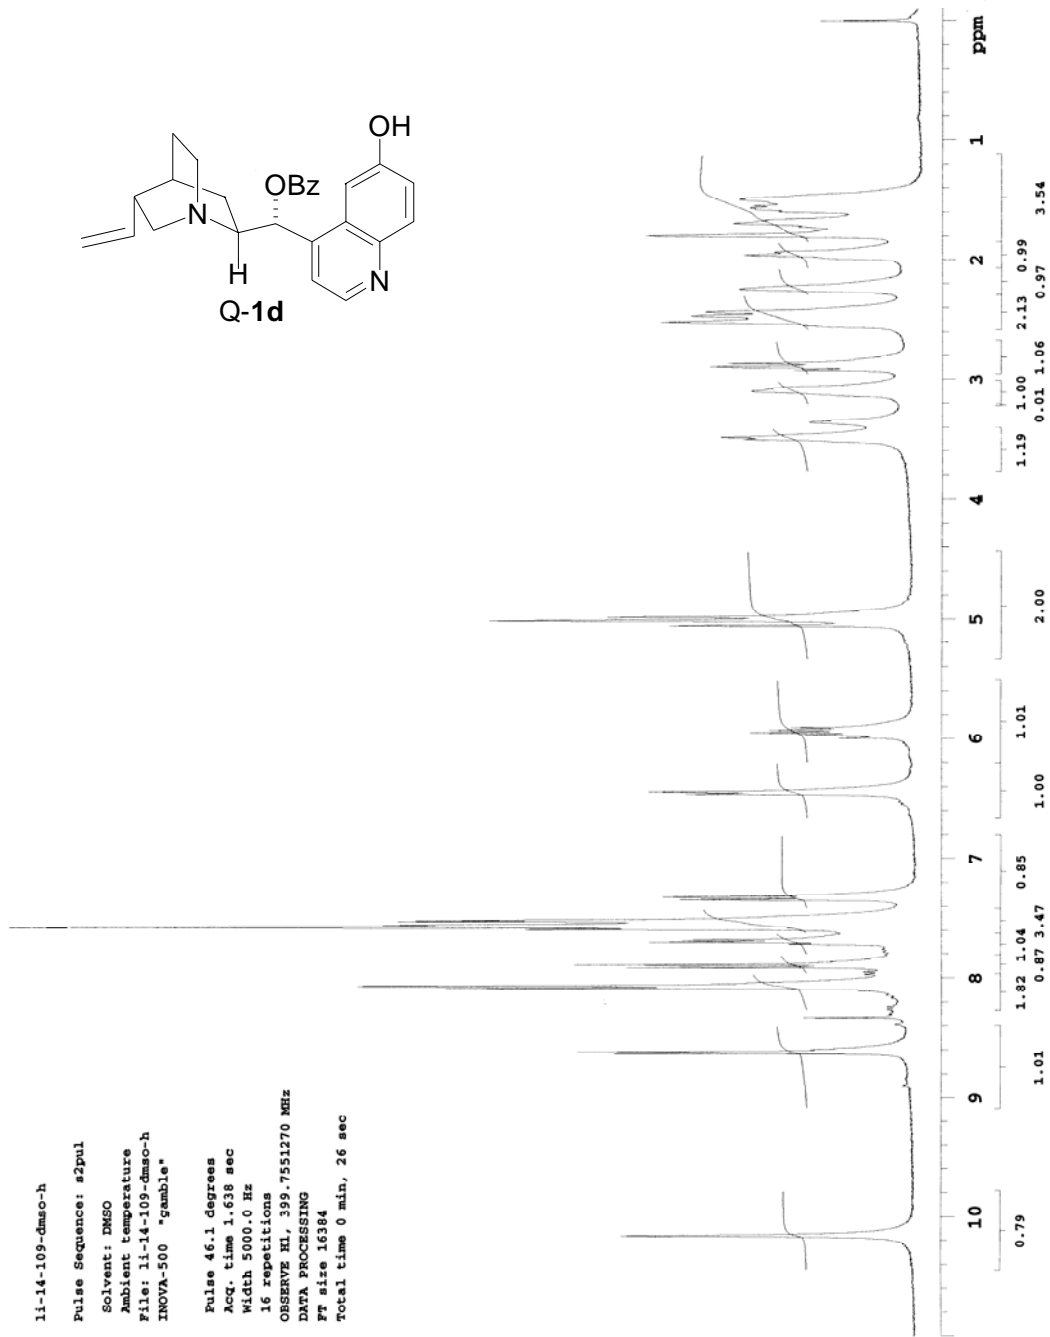

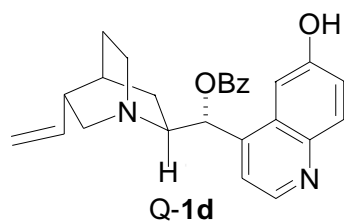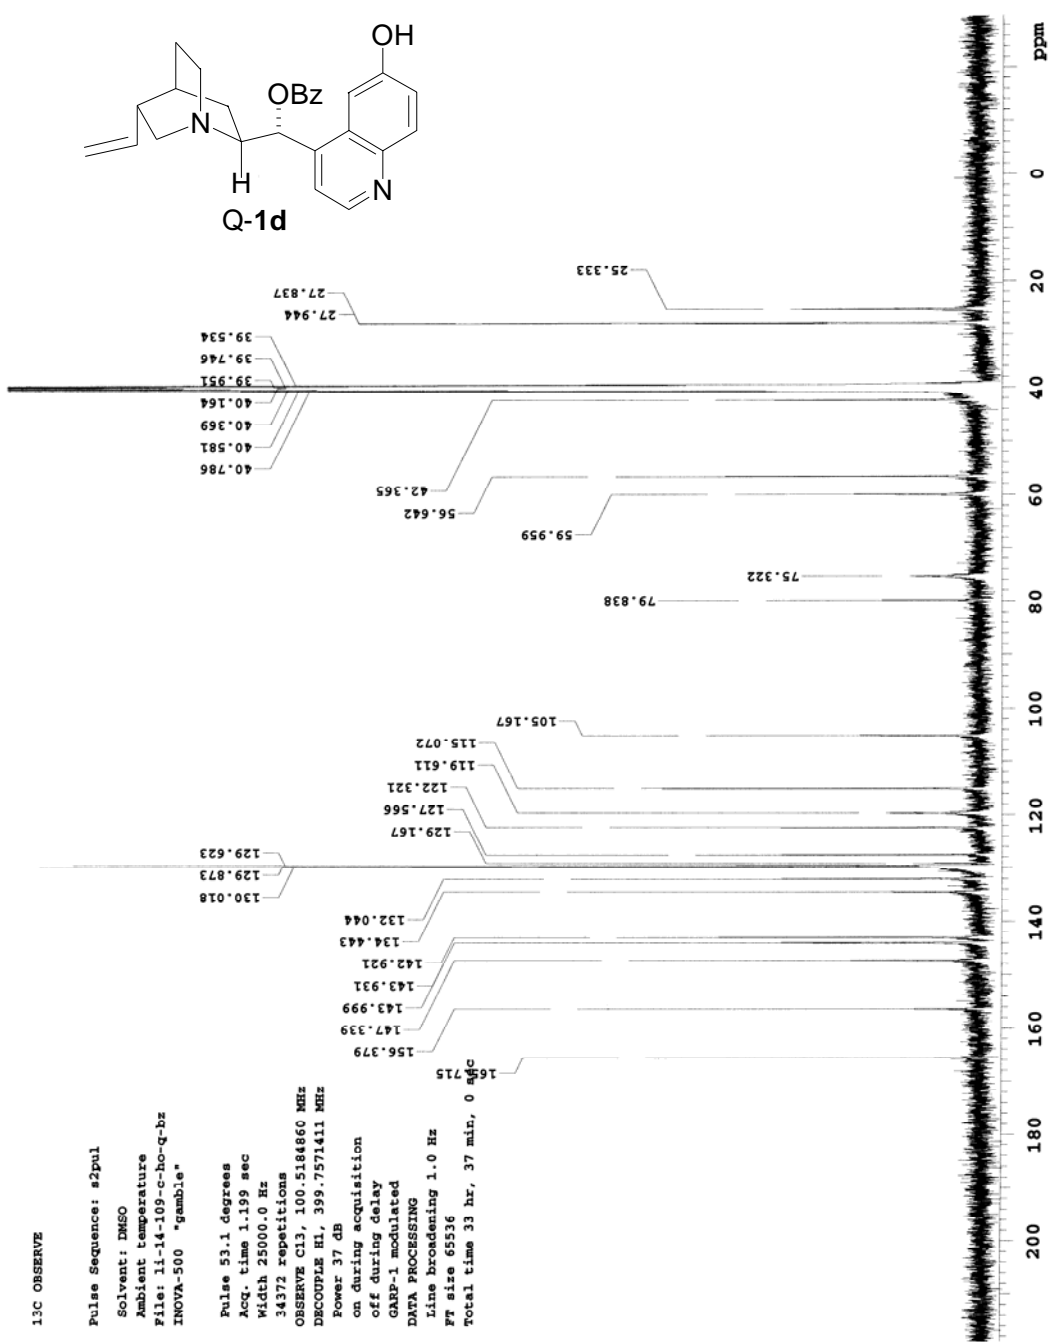

13C OBSERVE

Pulse Sequence: s2pul

Solvent: DMSO

Ambient temperature

File: 11-14-109-c-ho-q-bz

INOVA-500 "gamble"

Pulse 53.1 degrees

Acq. time 1.199 sec

Width 25000.0 Hz

34372 repetitions

OBSERVE C13, 100.5184860 MHz

DECOUPLE H1, 399.7571411 MHz

Power 37 dB

on during acquisition

off during delay

GARP-1 modulated

DATA PROCESSING

Line broadening 1.0 Hz

FT size 65536

Total time 33 hr, 37 min, 0 sec

11-14-103-h

Pulse Sequence: s2pul

Solvent: CDCl3

Ambient temperature

File: 11-14-103-h

INOVA-500 "gamble"

Pulse 46.1 degrees

Acq. time 1.638 sec

Width 5000.0 Hz

16 repetitions

OBSERVE F1, 399.7532149 MHz

DATA PROCESSING

FT size 16384

Total time 0 min, 26 sec

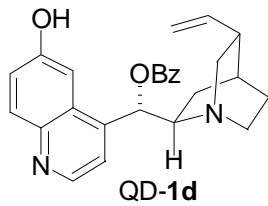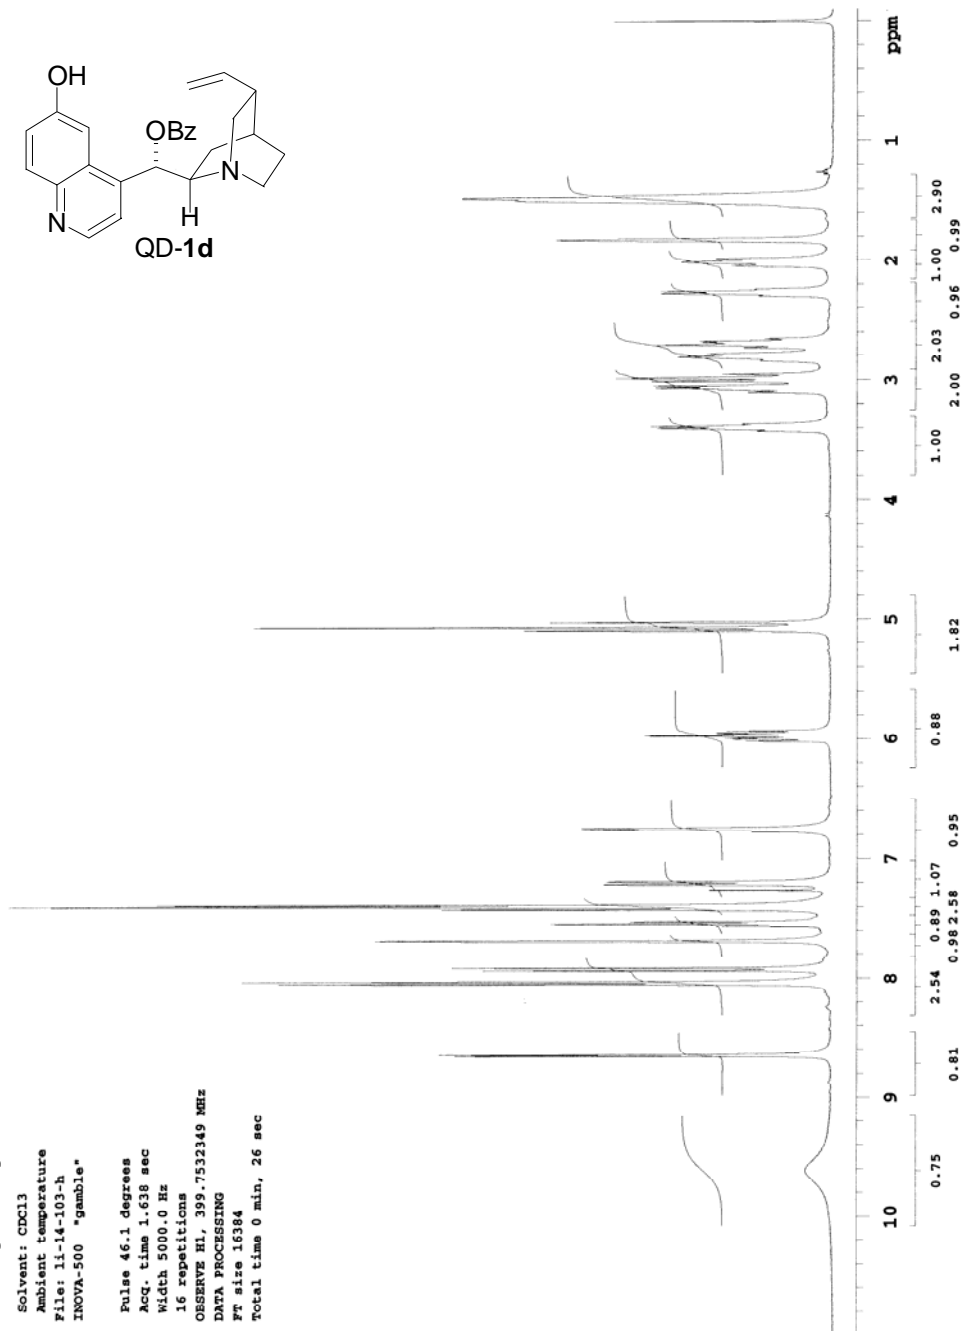

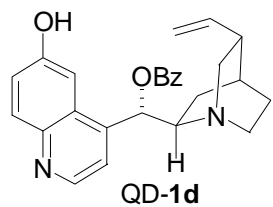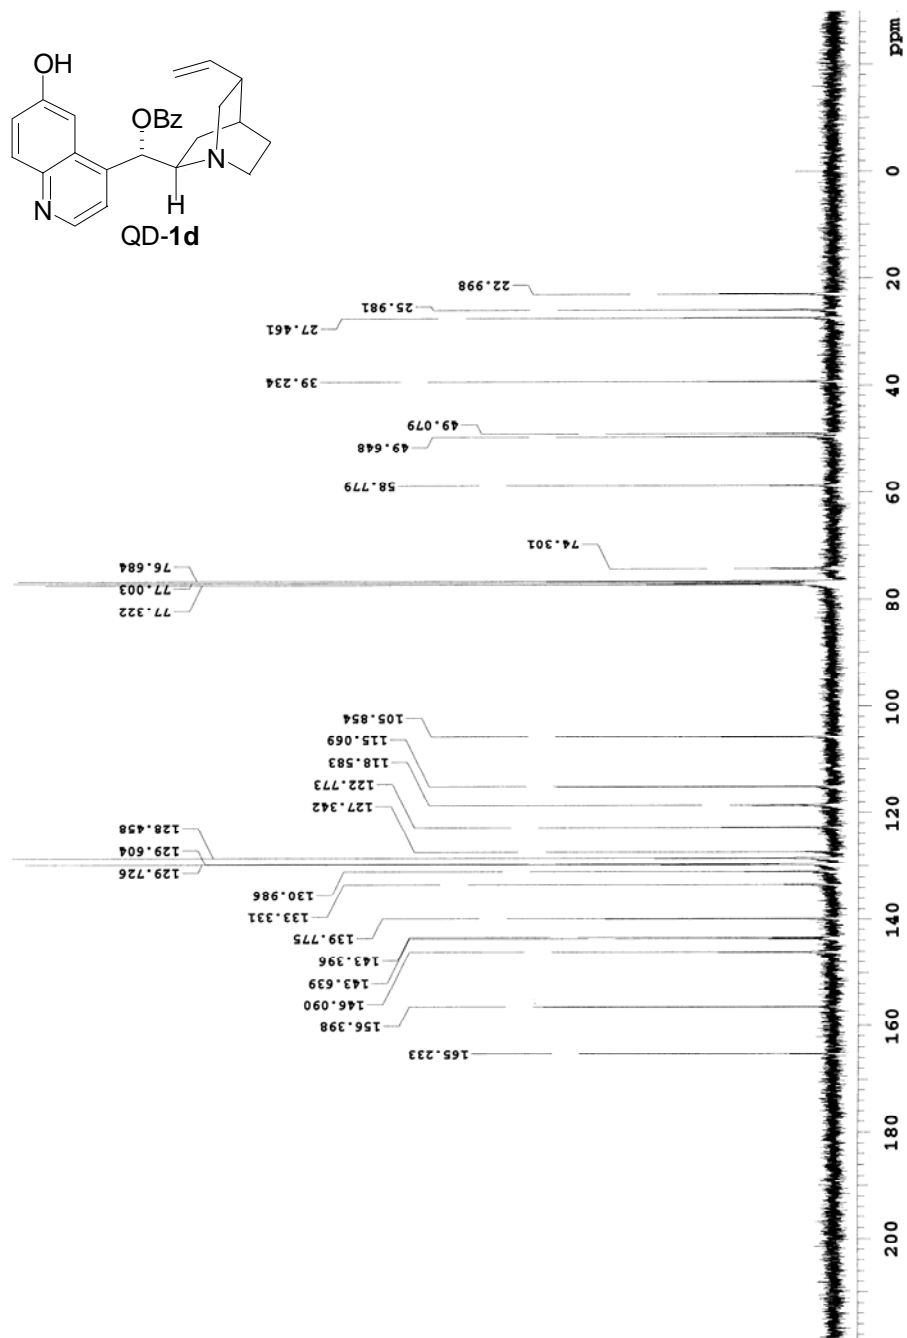

li-14-81-h

Pulse Sequence: s2pul  
Solvent: CDCl3  
Ambient temperature  
File: li-14-81-h  
INOVA-500 "gamble"

Pulse 46.1 degrees  
Acq. time 1.638 sec  
Width 5000.0 Hz  
64 repetitions  
OBSERVE HL, 399.7532349 MHz  
DATA PROCESSING  
Ft size 16384  
Total time 1 min, 45 sec

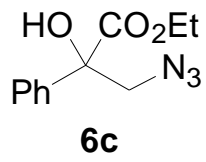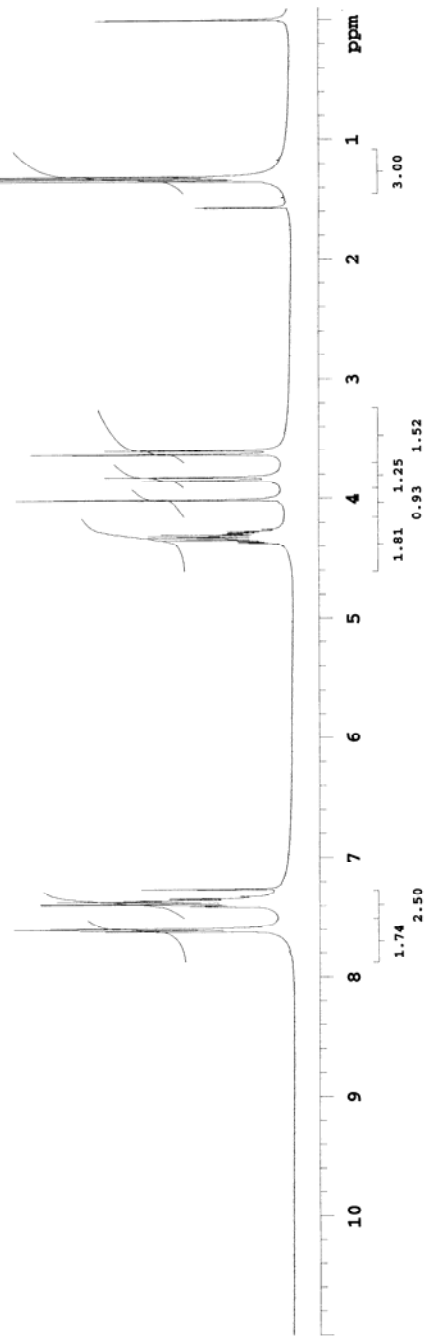

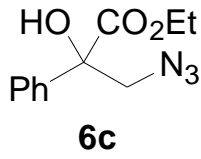

13C OBSERVE

Pulse Sequence: s2pul

Solvent: CDCl3

Ambient temperature

File: li-14-81-c

INOVA-500 "gamble"

Pulse 53.1 degrees

Acq. time 1.199 sec

Width 25000.0 Hz

1024 repetitions

OBSERVE C13, 100.5180359 MHz

DECOUPLE H1, 399.7552490 MHz

Power 37 dB

on during acquisition

off during delay

GARP-1 modulated

DATA PROCESSING

Line broadening 1.0 Hz

FT size 65536

Total time 20 min, 39 sec

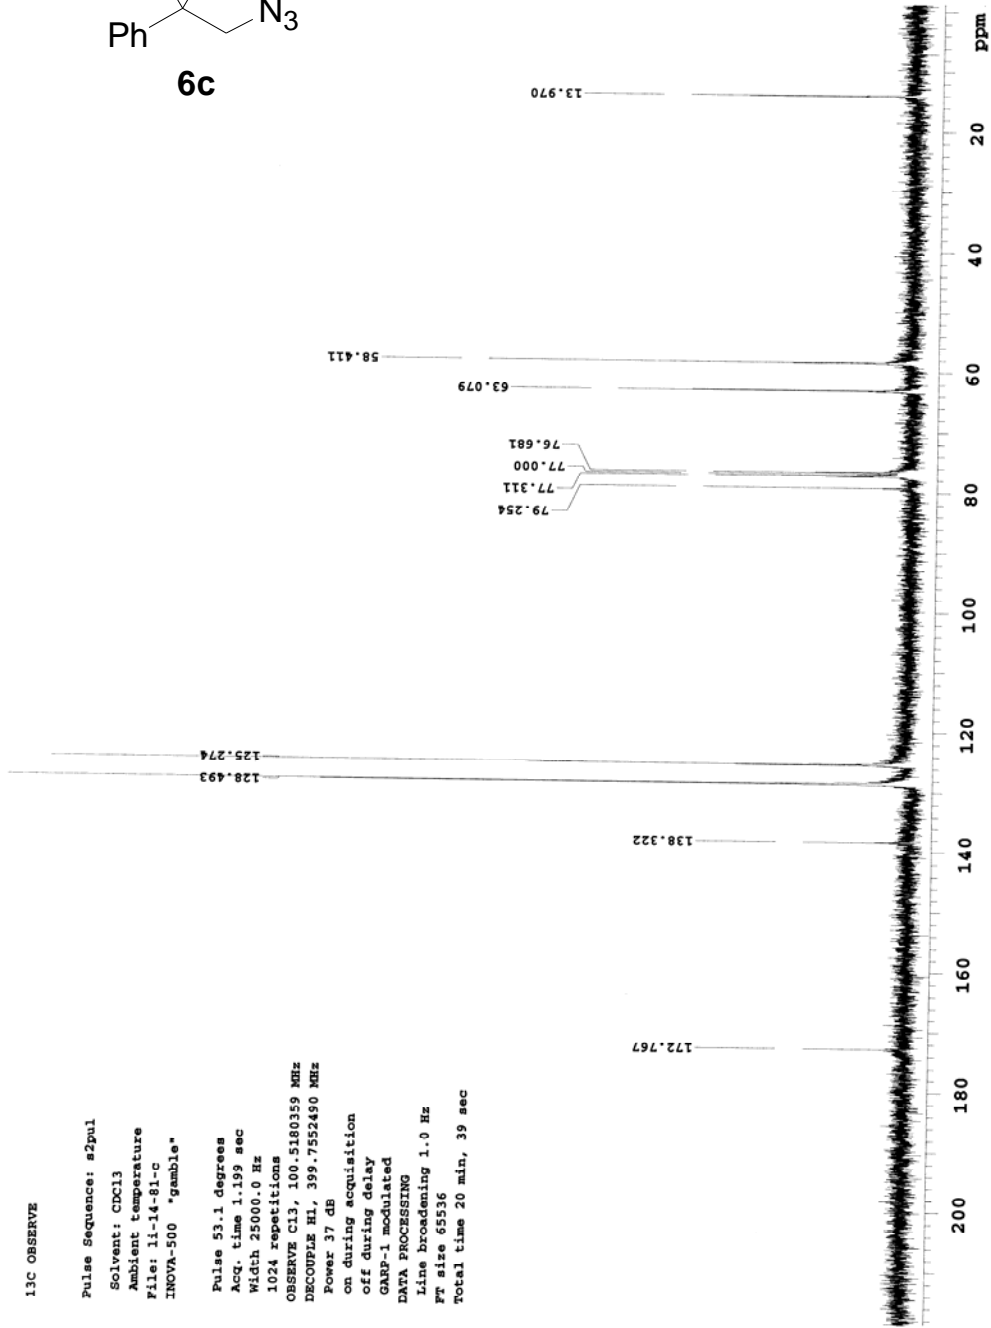

Supplement: NIHMS63178-supplement-1si20051126_05.pdf [file NIHMS63178-supplement-1si20051126_05.pdf]
